1 **Adaptive evolution of animal proteins over development: support for**  
2 **the Darwin selection opportunity hypothesis of Evo-Devo**

3 Jialin Liu<sup>1,2</sup>, Marc Robinson-Rechavi<sup>1,2\*</sup>

4

5 1 Department of Ecology and Evolution, University of Lausanne, Switzerland

6 2 Swiss Institute of Bioinformatics, Lausanne 1015, Switzerland

7 \* corresponding author: marc.robinson-rechavi@unil.ch

8

9 **Abstract**

10 A driving hypothesis of Evo-Devo is that animal morphological diversity is shaped  
11 both by adaptation and by developmental constraints. Here we have tested Darwin's  
12 "selection opportunity" hypothesis, according to which high evolutionary divergence  
13 in late development is due to strong positive selection. We contrasted it to a  
14 "developmental constraint" hypothesis, according to which late development is under  
15 relaxed negative selection. Indeed, the highest divergence between species, both at the  
16 morphological and molecular levels, is observed late in embryogenesis and post-  
17 embryonically. To distinguish between adaptation and relaxation hypotheses, we  
18 investigated the evidence of positive selection on protein-coding genes in relation to  
19 their expression over development, in fly *Drosophila melanogaster*, zebrafish *Danio*  
20 *rerio*, and mouse *Mus musculus*. First, we found that genes specifically expressed in  
21 late development have stronger signals of positive selection. Second, over the full  
22 transcriptome, genes with evidence for positive selection trend to be expressed in late  
23 development. Finally, genes involved in pathways with cumulative evidence of  
24 positive selection have higher expression in late development. Overall, there is a  
25 consistent signal that positive selection mainly affects genes and pathways expressed  
26 in late embryonic development and in adult. Our results imply that the evolution of  
27 embryogenesis is mostly conservative, with most adaptive evolution affecting some  
28 stages of post-embryonic gene expression, and thus post-embryonic phenotypes. This  
29 is consistent with the diversity of environmental challenges to which juveniles and  
30 adults are exposed.

31

## 32 **Introduction**

33 There are two main models to explain the relationship of development and  
34 evolutionary divergence. The early conservation model suggests that embryonic  
35 morphology between different species within the same group progressively diverges  
36 across development (Von Baer 1828); such groups are usually understood to by phyla  
37 in a modern context. In contrast, the hourglass model proposes that middle  
38 development (the morphological ‘phylotypic’ period) has the highest morphological  
39 similarity (Duboule 1994; Raff 1996). Based on recent genomic studies, both models  
40 have some level of molecular support. Some studies support the early conservation  
41 model (Roux and Robinson-Rechavi 2008; Artieri et al. 2009), while most recent ones  
42 support the hourglass model (Kalinka et al. 2010; Irie and Kuratani 2011; Levin et al.  
43 2012; Quint et al. 2012; Drost et al. 2015; Hu et al. 2017; Zalts and Yanai 2017). And  
44 in fact the two models may not be mutually exclusive (Piasecka et al. 2013; Liu and  
45 Robinson-Rechavi 2018).

46 Both the early conservation and hourglass models predict that late development has  
47 high evolutionary divergence. This high divergence of late development has been  
48 interpreted as a consequence of relaxed developmental constraints, i.e. weaker  
49 negative selection. For example, Garstang (1922) and Riedl (1978) suggested that the  
50 development of later stages is dependent on earlier stages, so higher divergence  
51 should be found in the later stages of development (cited in Irie and Kuratani 2014).  
52 Indeed, many studies have found evidence for relaxed purifying selection in late  
53 development (Castillo-Davis and Hartl 2002; Roux and Robinson-Rechavi 2008;  
54 Artieri et al. 2009; Kalinka et al. 2010; Liu and Robinson-Rechavi 2018). An  
55 alternative explanation, however, known as Darwin's “selection opportunity”  
56 hypothesis (Darwin 1871)(cited in Artieri et al. 2009), proposed that highly divergent  
57 late development could also be driven by adaptive evolution (positive selection), at  
58 least in part. This could be due to the greater diversity of challenges to which natural  
59 selection needs to respond in juvenile and adult life than in early and mid-  
60 development. Notably, weaker negative and stronger positive selection are not  
61 mutually exclusive. For example, Cai and Petrov (2010) found the accelerated  
62 sequence evolution rate of primate lineage specific genes driven by both relaxed  
63 purifying selection and enhanced positive selection. Necsulea and Kaessmann (2014)

64 suggested that the high evolution rate of testis transcriptome could be caused by both  
65 sex-related positive selection and reduced constraint on transcription.

66 As far as we know, few studies have tried to distinguish the roles of adaptation vs.  
67 relaxation of constraints in late development (Artieri et al. 2009), and no evidence has  
68 shown stronger adaptive evolution in late development. Yet there is an intuitive case  
69 for adaptation to act on phenotypes established in late development, because they will  
70 be present in the juvenile and adult, and interact with a changing environment.

71 In the case of detecting individual gene adaptation, one of the best established  
72 methods is using the ratio  $\omega$  of non-synonymous (dN) to synonymous (dS)  
73 substitutions (Yang and Nielsen 1998; Hurst 2002). Because synonymous changes are  
74 assumed to be functionally neutral,  $\omega > 1$  indicates evidence of positive selection. As  
75 adaptive changes probably affect only a few codon sites and at a few phylogenetic  
76 lineages, branch-site models allow the  $\omega$  ratio to vary both among codon sites and  
77 among lineages (Yang and Nielsen 2002; Zhang et al. 2005). Polymorphism based  
78 methods such as frequency spectrum, linkage disequilibrium and population  
79 differentiation can also be used to identify changes due to recent positive selection  
80 (Vitti et al. 2013).

81 Since several genes with slight effect mutations can act together to have a strong  
82 effect, adaptive evolution can act on the pathway level as well (Daub et al. 2013; Berg  
83 et al. 2014). In the case of polygenic adaptation, a gene set enrichment test has  
84 successfully been applied to detect gene sets with polygenic adaptive signals (Daub et  
85 al. 2013; Daub et al. 2017). This gene set enrichment analysis allows to detect weak  
86 but consistent adaptive signals from whole genome scale, unlike traditional  
87 enrichment tests which only consider top scoring genes with an arbitrary significance  
88 threshold.

89 In order to estimate the contribution of positive selection to the evolution of highly  
90 divergent late development, we have adopted three approaches. First, we used  
91 modularity analysis to obtain distinct sets of genes (modules) which are specifically  
92 expressed in different meta developmental stages (Piasecka et al. 2013; Levin et al.  
93 2016), and compared the signal of positive selection across modules. Second, we  
94 applied a modified “transcriptome index” (Domazet-Loso and Tautz 2010) to measure  
95 evolutionary adaptation on the whole transcriptome level. Finally, we used a gene set  
96 enrichment approach to detect polygenic selection on pathways, and studied the

97 expression of these gene sets over development. Each approach was applied to  
98 developmental transcriptomes from *D. rerio*, *M. musculus*, and *D. melanogaster* and  
99 to results of the branch-site test for positive selection in lineages leading to these  
100 species. All the analyses found a higher rate of adaptation in late and in some stages  
101 of post-embryonic development, including adult.

102

## 103 **Results**

104 In order to characterize the signal of positive selection, we used the log-likelihood  
105 ratio test statistic ( $\Delta\ln L$ ) of  $H_1$  to  $H_0$  models with or without positive selection, from  
106 the branch-site model (Zhang et al. 2005) as precomputed in Selectome on filtered  
107 alignments (Moretti et al. 2014), and as used in Roux et al. (2014) and Daub et al.  
108 (2017). Briefly,  $\Delta\ln L$  represents the evidence for positive selection, thus a branch in a  
109 gene tree with a higher value indicates higher evidence for positive selection for this  
110 gene over this branch.

111

## 112 **Modularity analysis**

113 For the modularity analysis, we focused on different sets of specifically expressed  
114 genes (modules) in each developmental period. Our expectation is that genes in each  
115 module have specific involvement during embryonic development (Piasecka et al.  
116 2013), so different adaptation rates of these genes should reflect a stage specific  
117 impact of natural selection. In addition, since the modules decompose the genes into  
118 different meta development stages, they allow to avoid the potential bias caused by  
119 imbalanced time points in each meta development stage from our transcriptome  
120 datasets; e.g., many more "late development" samples in fly than in the other two  
121 species studied. For *D. rerio*, we obtained seven modules from our previous study  
122 (Piasecka et al. 2013) (Figure S1). For *M. musculus* and *D. melanogaster*, we  
123 identified three and six modules respectively (see Methods; Figure S1).

124 Because not all genes have any evidence for positive selection, we first compared the  
125 proportion of genes either with strong evidence ( $q$ -value  $< 0.2$ ) or with weak evidence  
126 (no threshold for  $q$ -value;  $\Delta\ln L > 0$ ) of positive selection across modules. For strong  
127 evidence, the proportion is not significantly different across modules in *M. musculus*  
128 and *D. melanogaster* (Figure S2). In *D. rerio*, however, there is a higher proportion in  
129 the juvenile and adult modules. For the weak evidence, *D. melanogaster* has a higher

130 proportion in pupae and adult modules, but there is no significant difference in *D.*  
131 *rerio* and *M. musculus* (Figure S3).

132 We then compared the values of  $\Delta\ln L$  for genes with weak evidence of positive  
133 selection (Figure 1). In order to improve the normality of non-zero  $\Delta\ln L$ , we  
134 transformed  $\Delta\ln L$  with fourth root (Hawkins and Wixley 1986; Roux et al. 2014;  
135 Daub et al. 2017).

136 In *D. rerio*, we detected an hourglass pattern of  $\Delta\ln L$ , at its highest in late modules.  
137 Specifically, in the juvenile module, the mean  $\Delta\ln L$  is significantly higher than the  
138 mean  $\Delta\ln L$  for all genes (*p*-values reported in Table 1). We note that the adult module  
139 also has higher mean  $\Delta\ln L$ , even though it's not significant. In the pharyngula module,  
140 the mean  $\Delta\ln L$  is significantly lower than the mean  $\Delta\ln L$  for all genes, as expected  
141 under the hourglass model. In the other modules, the mean  $\Delta\ln L$  is not significantly  
142 different from the mean for all genes.

143 In *M. musculus*, similarly, we found an hourglass pattern of  $\Delta\ln L$ . The late embryo  
144 module has a higher mean  $\Delta\ln L$  than all genes, while the middle embryo module has a  
145 lower mean  $\Delta\ln L$  than all genes.

146 In *D. melanogaster*, however, we observed an early conservation pattern of  $\Delta\ln L$ .  
147 Specifically, in the early embryo module, the mean  $\Delta\ln L$  is lower than the mean  $\Delta\ln L$   
148 for all genes. In the adult module, the mean  $\Delta\ln L$  is higher than the mean  $\Delta\ln L$  for all  
149 genes. There is no significant difference for the other modules.

150 It should be noted that the patterns reported in this modularity analysis are relatively  
151 weak, especially in *D. melanogaster*. After multiple test correction, some of the  
152 reported differences are not significant anymore (Table S1).

153 Overall, these findings suggest that positive selection is stronger on genes expressed  
154 in late development or in adult than in early and middle development. It also indicates  
155 that  $\Delta\ln L$  on gene modules in different phyla supports different Evo-Devo models  
156 (hourglass vs. early conservation).

157

### 158 **Transcriptome index analysis**

159 Although modularity analysis guarantees independence between the sets of genes  
160 which are compared, it only considers a subset of genes. This leaves open whether the  
161 higher adaptive evolution in late development and adult holds true for the whole  
162 transcriptome as well, or just for these modular genes. Additionally, while trends were

163 detected, significance is weak. To consider the composition of the whole  
164 transcriptome and to increase our power to detect a signal of positive selection in  
165 development, we used a modified "Transcriptome Age Index" (Domazet-Loso and  
166 Tautz 2010) to calculate the weighted mean of  $\Delta\ln L$  for the transcriptome. Notably,  
167 all expression levels were log-transformed before use, unlike in Domazet-Loso and  
168 Tautz (2010). See discussion in Piasecka et al. (2013) and Liu and Robinson-Rechavi  
169 (2018), but briefly log-transformation provides insight on the overall transcriptome  
170 rather than a small number of highly expressed genes. We named this modified index  
171 "Transcriptome Likelihood Index" (TLI). A higher index indicates that the  
172 transcriptome has higher expression of transcripts from genes with high  $\Delta\ln L$  between  
173 models with and without positive selection.

174 In *D. rerio*, generally, the pattern resembles an hourglass like pattern (Figure 2). The  
175 TLI first decreases and reaches a minimum in the late stage of gastrula (8h), and then  
176 progressively increases until adult (ninth month), with finally a slight decline. In  
177 addition, in the adult stage, female has higher TLI than male, although the difference  
178 is weak. To test whether TLIs are different between developmental periods, we  
179 compared the mean TLI of all stages within a period, between each pair of periods  
180 (see Methods). We found that middle development has low TLI, early development  
181 has medium TLI, late development and maternal stage have very similar high TLI,  
182 and adult has the highest TLI. Except late development and maternal stage ( $p=0.24$ ),  
183 all pairwise comparisons are significant:  $p<5.7e-07$ .

184 In *M. musculus*, we observed a clear hourglass-like pattern of TLI. For the mean TLI  
185 comparison, we found low TLI in middle development, medium TLI in early  
186 development, high TLI in late development, and the highest TLI in maternal stage (all  
187 pairwise comparisons are significant:  $p<2e-16$ ). Of note, unlike in *D. rerio*, the "late  
188 development" here only contains late embryo stages, but no post embryo stages. This  
189 may explain why late development has lower TLI than the maternal stage in this  
190 dataset.

191 In *D. melanogaster*, we found the TLI progressively increasing over development,  
192 suggesting an early conservation model. Unlike in *D. rerio*, we found that male has  
193 higher TLI than female in the adult stage. For the mean TLI comparison, early  
194 development has low TLI, middle development has medium TLI, late development

195 has high TLI, and adult has the highest TLI (all pairwise comparisons are significant:  
196  $p < 2e-16$ ).

197 As in the modularity analysis, but with much stronger signal, both *D. rerio* and *M.*  
198 *musculus* support the hourglass model, while *D. melanogaster* follows an early  
199 conservation model. Again, from whole transcriptome level, these results indicate that  
200 genes with evidence for positive selection are more highly expressed in late  
201 development and adult. Interestingly, the maternal stage has a comparable high TLI to  
202 late development. This could be related to the maternal stage being dominated by  
203 adult transcripts (Tadros and Lipshitz 2009). In this respect (transcriptome evolution),  
204 the maternal stage should maybe be regarded as a special adult stage rather than as an  
205 early embryonic stage.

206

### 207 **Polygenic selection analysis**

208 Positive selection can be detected at the biological pathway level, even when  
209 individual genes within the pathway only fix small effect mutations (Daub et al. 2013;  
210 Berg et al. 2014; Daub et al. 2017). Thus, we searched for such signals of positive  
211 selection on pathways. Briefly, we calculated the sum of  $\Delta \ln L$  (SUMSTAT statistic)  
212 for a pathway, and inferred the significance of this SUMSTAT with an empirical null  
213 distribution (Tintle et al. 2009; Daub et al. 2013; Daub et al. 2017). In total, we  
214 identified 10, 4 and 9 pathways with a significant signal of positive selection,  
215 respectively in lineages leading to *D. rerio*, *M. musculus* and *D. melanogaster* ( $q$ -  
216 value  $< 0.2$ , Table2).

217 The function of these pathways, while not our primary focus, is consistent with  
218 adaptive evolution of juvenile or adult phenotypes. First, we found metabolism related  
219 pathways in all three species, suggesting pervasive adaptation, possibly related to diet;  
220 this is consistent with previous results in primates (Daub et al. 2017). Second, in *D.*  
221 *rerio* and *D. melanogaster*, several pathways are involved in morphogenesis and  
222 remodelling of organs (e.g., laminin interactions, extra cellular matrix, ECM-receptor  
223 interaction), suggesting potential adaptive evolution of morphological development.  
224 Third, there are several pathways involved in aging in *D. melanogaster* and *M.*  
225 *musculus* (e.g., reactive oxygen detoxification, longevity regulation, mitochondrial  
226 translation), suggesting potential role of natural selection on modulating lifespan or on  
227 metabolic activity. Forth, in *D. rerio*, we detected one pathway related to



228 environmental adaptation: visual phototransduction; adaptations in vision are  
229 expected for aquatic species which under a wide variety of visual environments  
230 (Sabbah et al. 2010).

231 If late development and adult are under stronger positive selection at the pathway  
232 level as well, we expect genes involved in pathways with a signal of positive selection  
233 to be more highly expressed at these periods. Thus we computed the ratio of median  
234 expression between positively selected pathway genes and genes included in  
235 pathways not positively selected. Since the median expression in the first time point  
236 of *M. musculus* is 0, we removed it from our analysis.

237 In *D. rerio*, the ratio of median expression keeps increasing until the juvenile stage.  
238 Then, it slightly decreases (Figure 3). In *M. musculus*, except the first time point, the  
239 ratio of median expression also progressively increases. In *D. melanogaster*, there is a  
240 small peak in the first time point, but it quickly decreases to minimum within the  
241 same developmental period. Then, it keeps increasing until the middle of the larval  
242 stage. Finally, for the last development stages, it resembles a wave pattern: decrease,  
243 increase and decrease again. Again, we also tested the difference between male and  
244 female in adult stages for *D. rerio* and *D. melanogaster*. Unlike the observation in the  
245 transcriptome index analysis, here we found that male has higher ratio of median  
246 expression than female in both species.

247 Overall, consistent with previous results, we found that late development and adult  
248 tend to express genes involved in pathways enriched for signal of positive selection,  
249 indicating that adaptive evolution at the pathway level mainly affects these stages.  
250 While there is some signal of early development adaptive evolution on single genes,  
251 the later developmental signal is more consistent at the pathway level. Because  
252 pathways link genes to phenotypes (Müller 2007; Wray 2007; Tickle and Urrutia  
253 2017), this suggests stronger phenotypic adaptation in late development and adult.

254

## 255 **Discussion**

### 256 **Correcting confounding factors**

257 Since some non-adaptive factors (such as gene length, tree size (number of branches),  
258 and branch length) can be correlated with  $\Delta\ln L$  and affect our results (Daub et al.  
259 2017), we investigated the correlation between  $\Delta\ln L$  and these potential confounding  
260 factors. Generally, we found a small correlation between  $\Delta\ln L$  and tree size, but a



261 larger correlation between  $\Delta\ln L$  and gene length or branch length (Figure S4). One  
262 explanation for this high correlation between  $\Delta\ln L$  and gene length is that long genes  
263 could accumulate more mutations than short genes, so we have more power to detect  
264 positive selection with higher number of mutations (Fletcher and Yang 2010; Gharib  
265 and Robinson-Rechavi 2013). So, we checked the influence of gene length on our  
266 results. Because branch length is inferred from the number of mutations, and higher  
267 branch length can be driven by higher evolutionary rate due to positive selection, we  
268 did not check further the correlation between  $\Delta\ln L$  and branch length.

269 In order to investigate whether gene length might have affected our results, for  
270 modularity and TLI analysis, we tested whether patterns purely based on gene length  
271 are similar to those based on  $\Delta\ln L$  or not. Surprisingly, we found an opposite pattern  
272 of gene length, relative to  $\Delta\ln L$ . For modularity analysis, the modules with higher  
273  $\Delta\ln L$  have significantly lower mean gene length than all genes (Figure S5). For  
274 transcriptome index analysis, the stages with higher TLI trend to have lower  
275 transcriptome index for gene length (Figure S6), suggesting that these stages trend to  
276 express shorter genes. These findings imply that the detection of higher positive  
277 selection in late development is not driven by gene length.

278 Immune system genes can bias positive selection analyses, since they evolve under  
279 pervasive positive selection (Flajnik and Kasahara 2010). To control for this, we also  
280 confirmed our findings after removing immune genes from our analysis (Figure S7).

281

## 282 **Developmental constraint hypothesis and Darwin's selection opportunity** 283 **hypothesis**

284 Despite the repeated observation that late development is highly divergent for diverse  
285 genomic properties (sequence evolution, duplication, gene age, expression divergence)  
286 in diverse animal species (Roux and Robinson-Rechavi 2008; Domazet-Loso and  
287 Tautz 2010; Kalinka et al. 2010; Irie and Kuratani 2011; Levin et al. 2012; Piasecka et  
288 al. 2013; Drost et al. 2015; Liu and Robinson-Rechavi 2018), the underlying  
289 evolutionary forces driving such a pattern remain obscure. The “developmental  
290 constraint” hypothesis (Raff 2000; Brakefield 2006) suggests that this high divergence  
291 is due to relaxed purifying selection, whereas Darwin's "selection opportunity"  
292 hypothesis proposes stronger positive selection (as discussed in Artieri et al. 2009;  
293 Kalinka and Tomancak 2012).

294 Several studies have found evidence, direct or indirect, to support the importance of  
295 developmental constraints (Castillo-Davis and Hartl 2002; Roux and Robinson-  
296 Rechavi 2008; Artieri et al. 2009; Kalinka et al. 2010). For example, we (Roux and  
297 Robinson-Rechavi 2008) found that genes expressed earlier in development contain a  
298 higher proportion of essential genes, and Uchida et al. (2018) found strong embryonic  
299 lethality from random mutations in early development. Weaker purifying selection in  
300 late development would imply that genes expressed in this period have less fitness  
301 impact, which is consistent with the paucity of essential genes. Here and in Liu and  
302 Robinson-Rechavi (2017) the branch-site codon model allows us to isolate the  
303 contribution of purifying selection to coding sequence evolution. We found indeed  
304 that genes under weaker purifying selection on the protein sequence trend to be  
305 expressed in late development (Liu and Robinson-Rechavi 2018). This provides direct  
306 evidence of relaxed purifying selection in late development.

307 To the best our knowledge, there has been no direct test of Darwin's "selection  
308 opportunity" hypothesis. One such study, in *D. melanogaster*, was proposed by Artieri  
309 et al. (2009). Unfortunately, they only had relatively poor expression data (ESTs) and  
310 limited time points (embryonic, larval/pupal and adult), and they did not find any  
311 direct evidence of higher positive selection in late development. Since they noticed  
312 that the accelerated sequence evolution of genes expressed at adult stage was  
313 confounded by male-biased genes, they argued that the rapid evolution observed in  
314 late development could be due to specific selective pressures such as sexual selection.  
315 A recent study, in *D. melanogaster*, provides indirect evidence: using in situ  
316 expression data and population genomic data to map positive selection to different  
317 embryonic anatomical structures, Salvador-Martínez et al. (2018) found larva stage  
318 enriched with signal of positive selection. Our results clearly provide a quantitative  
319 test which supports a role of positive selection in the high divergence of late  
320 development. While our sampling is very far from covering the diversity of  
321 developmental modes of animals, we show consistent patterns in a placental mammal,  
322 a direct development ray-finned fish, and a holometabolous insect. While it is possible  
323 that other patterns will be found in species with different development, this shows that  
324 adaptation in late development is not limited to one model. We show that this is not  
325 due to testis-expressed genes (Figure S8). In addition, in vertebrates, we also found  
326 some evidence of adaptive evolution in early development on single genes. This

327 indicates that some changes in early development might be adaptive consequences to  
328 diverse ecological niches, as proposed by Kalinka and Tomancak (2012). It should be  
329 noted that our results also provide counter evidence to the adaptive penetrance  
330 hypothesis, which argues that adaptive evolution mainly occurs in the middle  
331 development (Richardson 1999).

332

### 333 **Re-unification of structuralist and functionalist comparative biology**

334 There have been two major approaches to comparative biology since the late 18th  
335 century: the structuralist approach (which gave rise to Evo-Devo) emphasizes the role  
336 of constraints, and often focuses on investigating spatial and timing variations of  
337 conserved structures in distantly related species. In a modern context, the focus is  
338 often on comparing developmental genes' expression between species. The  
339 functionalist or adaptationist approach (which gave rise to the Modern Synthesis and  
340 most of evolutionary biology) emphasizes the role of natural selection. In a modern  
341 context, the focus is often on investigating adaptive mutations. It has been suggested  
342 that these two approaches could not be reconciled (Amundson 2007), since the former  
343 underscores how mutations generate morphological diversity, while the later  
344 underscores whether mutations are fixed by positive selection or not. A good example  
345 of the differences between structuralist and adaptationist comes from the debate  
346 between Hoekstra and Coyne (2007) and Carroll (2008). As a structuralist, Carroll  
347 suggested that mutations affecting morphology largely occur in the *cis*-regulatory  
348 regions. However, as adaptationists, Hoekstra and Coyne argued that this statement is  
349 at best premature. Their main argument was that they didn't find that adaptive  
350 evolution was more likely occur in *cis*-regulatory elements, but rather in protein  
351 coding genes, from both genome-wide surveys and single-locus studies. It is  
352 important to note that Carroll's theory is specific to morphological evolution, but not  
353 directly related to evolutionary adaptation. Basically, both sides could be correct, and  
354 were mostly discussing different things.

355 Since both adaptation and structure are part of biology, we should be able to explain  
356 both in a consistent manner. Here, we try to bridge positive selection and  
357 morphological evolution by combining developmental time-series transcriptomes,  
358 positive selection inference on protein coding genes, modularity analysis,  
359 transcriptome index analysis, and gene set analysis. From both modularity analysis

360 and transcriptome index analysis, we found that genes highly expressed in late  
361 development and adult have higher evidence for positive selection. From polygenic  
362 analysis, we found that the expression of positively selected pathways is higher in late  
363 development and adult. Overall, these results suggest that higher morphological  
364 variation in late development could be at least in part driven by adaptive evolution. In  
365 addition, coding sequence evolution might also make a significant contribution to the  
366 evolution of morphology, as suggested by Hoekstra and Coyne (2007) and Burga et al.  
367 (2017). This is also supported by the observation of tissue-specific positive selection  
368 in *D. melanogaster* development (Salvador-Martínez et al. 2018). It should be noted  
369 that we do not test here whether regulatory sequence evolution plays a similar or  
370 greater role, since we do not have equivalent methods to test for positive selection in  
371 regulatory regions.

372

## 373 **Materials and Methods**

374 Data files and analysis scripts are available on our GitHub repository:  
375 <https://github.com/ljljolinq1010/Adaptive-evolution-in-late-development-and-adult>

### 376 **Expression data sets**

377 For *D. rerio*, the log-transformed and normalized microarray data was downloaded  
378 from our previous study (Piasecka et al. 2013). This data includes 60 stages from egg  
379 to adult, which originally comes from Domazet-Loso and Tautz (2010).

380 For *M. musculus*, the processed RNA-seq (normalized but non-transformed) data was  
381 retrieved from Hu et al. (2017). This data includes 17 stages from 2cells to E18.5. We  
382 further transformed it with  $\log_2$ .

383 For *D. melanogaster*, we obtained processed (normalized but non-transformed) RNA-  
384 seq data from <http://www.stat.ucla.edu/~jingyi.li/software-and-data.html> Li et al.  
385 (2014), which originally comes from Graveley et al. (2011). This data has 27 stages  
386 from embryo to adult. For the last three stages, since data were available for male and  
387 female, we took the mean. We further transformed it with  $\log_2$ .

### 388 **Branch-site likelihood test data**

389 The log-likelihood ratio ( $\Delta\ln L$ ) values of a test for positive selection were retrieved  
390 from Selectome (Moretti et al. 2014), a database of positive selection based on the  
391 branch-site likelihood test (Zhang et al. 2005). One major advantage of this test is  
392 allowing positive selection to vary both among codon sites and among phylogenetic

393 branches. The branch-site test contrasts two hypotheses: the null hypothesis is that no  
394 positive selection occurred ( $H_0$ ) in the phylogenetic branch of interest, and the  
395 alternative hypothesis is that at least some codons experienced positive selection ( $H_1$ ).  
396 The log likelihood ratio statistic ( $\Delta\ln L$ ) is computed as  $2*(\ln LH_1 - \ln LH_0)$ .  
397 Importantly, in order to mitigate false positives due to poor sequence alignments,  
398 Selectome integrates filtering and realignment steps to exclude ambiguously aligned  
399 regions.

400 We used  $\Delta\ln L$  from the Clupeocephala branch, the Murinae branch and the  
401 *Melanogaster* group branch for *D. rerio*, *M. musculus* and *D. melanogaster*  
402 respectively. One gene could have two  $\Delta\ln L$  values in the focal branch because of  
403 duplication events. In this case, we keep the value of the branch following the  
404 duplication and exclude the value of the branch preceding the duplication.

#### 405 **Pathways**

406 We downloaded lists of 1,683 *D. rerio* gene sets, 2,269 *M. musculus* gene sets and  
407 1365 *D. melanogaster* gene sets of type “pathway” from the NCBI Biosystems  
408 Database (Geer et al. 2009). This is a repository of gene sets collected from manually  
409 curated pathway databases, such as BioCyc (Caspi et al. 2014), KEGG (Kanehisa et al.  
410 2014), Reactome (Croft et al. 2014), The National Cancer Institute Pathway  
411 Interaction Database (Schaefer et al. 2009) and Wikipathways (Kelder et al. 2012).

#### 412 **Coding sequence length**

413 We extracted coding sequence (CDS) length from Ensembl version 84 (Yates et al.  
414 2016) using BioMart (Kinsella et al. 2011). For genes with several transcripts, we  
415 used the transcript with the maximal CDS length.

#### 416 **Testis specific genes**

417 Testis specific genes for *M. musculus* and *D. melanogaster* were obtained from a  
418 parallel study (Liu and Robinson-Rechavi 2018). The testis specific genes were  
419 defined as genes with highest expression in testis and with tissue specificity value  $\geq$   
420 0.8.

#### 421 **Immune genes**

422 To control for the impact of immune system genes, we downloaded all genes involved  
423 in the “immune response” term (GO:0006955) from AmiGO (Carbon et al. 2009)  
424 (accessed on 25.04.2018), and repeated analyses with these genes excluded.

#### 425 **Phylogenic period**

426 The definition of phylotypic period is based on previous morphological and genomic  
427 studies. For *D. melanogaster*, the phylotypic period defined as extended germband  
428 stage (Sander 1983; Kalinka et al. 2010); for *D. rerio*, the phylotypic period defined  
429 as segmentation and pharyngula stages (Ballard 1981; Wolpert 1991; Slack et al. 1993;  
430 Domazet-Loso and Tautz 2010); for *M. musculus*, the phylotypic period defined as  
431 Theiler Stage 13 to 20 (Ballard 1981; Wolpert 1991; Slack et al. 1993; Irie and  
432 Kuratani 2011).

### 433 **Module detection**

434 For *D. rerio*, we obtained seven modules from our previous study (Piasecka et al.  
435 2013). This is based on the Iterative Signature Algorithm, which identifies modules  
436 by an iterative procedure (Bergmann et al. 2003). Specifically, it was initialized with  
437 seven artificial expression profiles, similar to presented in Figure S11. Each profile  
438 corresponds to one of the zebrafish meta developmental stages. Next, the algorithm  
439 will try to find genes with similar expression profiles to these artificial ones through  
440 iterations until the processes converges. This method has proven to be very specific,  
441 but lacks power with medium or small datasets (<30 time points). For mouse and fly,  
442 the sample size is not enough, so we used the method introduced by Levin et al.  
443 (2016). Firstly, we generated standardized gene expression for each gene  
444 by subtracting its mean (across all stages) and dividing by its standard deviation. Next,  
445 we calculated the first two principal components of each gene based on the  
446 standardized expression across development. Since the expression was standardized,  
447 the genes form a circle with scatter plot (Figure S9). Then, we computed the four-  
448 quadrant inverse tangent for each gene based on its principal components, and sort  
449 these values to get gene expression order from early to late (Figure S10). Next, we  
450 performed Pearson correlation of the standardized expression and idealized  
451 expression profile of each module (Figure S11). Finally, for each module, we defined  
452 genes with correlation coefficient rank in top 10% as modular genes. Clearly, the  
453 genes in earlier modules have higher gene orders (Figure S9).

454

### 455 **Randomization test of modularity analysis**

456 For each module, we randomly choose the same number of  $\Delta \ln L$  from all modular  
457 genes (genes attributed to any module in that species) without replacement and  
458 calculated the mean value. We repeated this 10000 times and approximated a normal  
459 distribution for the mean value of  $\Delta \ln L$ . The  $p$ -value that the mean value of interested

460 module is higher (or lower) than the mean value from all modular genes is the  
461 probability that the randomly sampled mean value of  $\Delta\ln L$  is higher (or lower) than  
462 the original mean value of  $\Delta\ln L$ . In the same way, we also estimated the  $p$ -value of  
463 the median  $\Delta\ln L$  value.

#### 464 **Transcriptome index of log-likelihood ratio (TLI)**

465 The TLI is calculated as:

$$\text{TLI}_s = \frac{\sum_{i=1}^n \sqrt[4]{\Delta\ln L_i} e_{is}}{\sum_{i=1}^n e_{is}},$$

466  
467  $s$  is the developmental stage,  $\Delta\ln L_i$  is the value of log-likelihood ratio for gene  $i$ ,  $n$  the  
468 total number of genes and  $e_{is}$  is the log-transformed expression level of gene  $i$  in  
469 developmental stage  $s$ . Here, we used all  $\Delta\ln L$  values without applying any cut-off on  
470  $\Delta\ln L$  or the associated  $p$ -value. For genes with  $\Delta\ln L < 0$ , we replaced it with 0. For *M.*  
471 *musculus*, we calculated the TLI from a merged data set, instead of computing it on  
472 two data sets separately.

#### 473 **Polynomial regression**

474 For polynomial regression analysis, we keep increasing the degree of polynomial  
475 model until no further significant improvement (tested with ANOVA,  $p < 0.05$  as a  
476 significant improvement). For *M. musculus*, since the development time points in  
477 transcriptome data set are close to uniformly sampled, we used the natural scale of  
478 development time for regression. For *C. elegans*, *D. melanogaster* and *D. rerio*,  
479 however, we used the logarithmic scale, to limit the effect of post-embryonic time  
480 points.

#### 481 **Bootstrap approach for transcriptome index of $\Delta\ln L$ (TLI) comparison between** 482 **developmental periods**

483 Firstly, we randomly sampled the same size of genes from original gene set (with  
484 replacement) for 10,000 times. In each time, we calculated the TLI of each  
485 development stage. Then, we calculated the mean TLI (mean TLI of all stages within  
486 a period) for each developmental period (maternal stage, early development, middle  
487 development, late development, and adult). Thus, each developmental period contains  
488 10,000 mean TLI. Finally, we performed pairwise Wilcoxon test to test the  
489 differences of mean TLI between developmental periods.



## 490 **Detection of polygenic selection**

491 We performed a gene set enrichment approach to detect polygenic signals of positive  
492 selection on pathways (Ackermann and Strimmer 2009; Daub et al. 2013; Daub et al.  
493 2017). For each pathway, we calculated its SUMSTAT score, which is the sum of  
494  $\Delta\ln L$  of all genes within this pathway. The  $\Delta\ln L$  values were fourth-root transformed.  
495 This approach makes the distribution of non-zero  $\Delta\ln L$  approximate normal  
496 distribution (Canal 2005; Roux et al. 2014; Daub et al. 2017). So, with fourth-root  
497 transformation, we limit the risk that the significant pathways we found be due to a  
498 few outlier genes with extremely high  $\Delta\ln L$ . The SUMSTAT score of a pathway is  
499 calculated as:

$$\text{SUMSTAT}_p = \sum_{i \in p} \sqrt[4]{\Delta\ln L_i},$$

500

501 where  $p$  represents a pathway, and  $\Delta\ln L_i$  represents the value of log-likelihood ratio  
502 for gene  $i$  within pathway  $p$ . Pathways less than 10  $\Delta\ln L$  values were excluded from  
503 our analysis. Like in TLI analysis, we used all  $\Delta\ln L$  values and replaced  $<0$  values  
504 with 0.

## 505 **Empirical null distribution of SUMSTAT**

506 We used a randomization test to infer the significance of the SUMSTAT score of a  
507 pathway. To correct for the potential bias caused by gene length, we firstly created  
508 bins with genes that have similar length (Figure S12). Secondly, we randomly  
509 sampled (without replacement) the same number of genes from each bin, to make the  
510 total number of genes equal to the pathway being tested. Thirdly, we computed the  
511 SUMSTAT score of the randomly sampled  $\Delta\ln L$  values. We repeated the second and  
512 third processes one million times. Fourthly, we approximated a normal distribution  
513 for SUMSTAT score of the interested pathway. Finally, the  $p$ -value was calculated as  
514 the probability that the expected SUMSTAT score is higher than the observed  
515 SUMSTAT score.

## 516 **Removing redundancy in overlapping pathways (“pruning”)**

517 Because some pathways share high  $\Delta\ln L$  value genes, the identified significant  
518 pathways might be partially redundant. In other words, shared genes among several  
519 pathways can drive all these pathways to score significant. We therefore removed the  
520 overlap between pathways with a “pruning” method (Daub et al. 2013; Daub et al.  
521 2017). Firstly, we inferred the  $p$ -value of each pathway with the randomization test.

522 Secondly, we removed the genes of the most significant pathway from all the other  
523 pathways. Thirdly, we ran the randomization test on these updated gene sets. Finally,  
524 we repeated the second and third procedures until no pathways were left to be tested.  
525 With this “pruning” method, the randomization tests are not independent and only the  
526 high scoring pathways will remain, so we need to estimate the False Discovery Rate  
527 (FDR) empirically. To achieve this, we applied the “pruning” method to pathways  
528 with permuted  $\Delta\ln L$  scores and repeated it for 300 times. So, for each pathway, we  
529 obtained one observed  $p$ -value ( $p^*$ ) and 300 empirical  $p$ -values. The FDR was  
530 calculated as follow:

$$\hat{FDR}(p^*) = \frac{\pi_0 \hat{V}(p^*)}{R(p^*)},$$

531  
532 where  $\pi_0$  represents the proportion of true null hypotheses,  $\hat{V}(p^*)$  represents the  
533 estimated number of rejected true null hypotheses and  $R(p^*)$  represents the total  
534 number of rejected hypotheses. For  $\pi_0$ , we conservatively set it equal to 1 as in Daub  
535 et al. (2017). For  $\hat{V}(p^*)$ , in each permutation analysis, we firstly calculated the  
536 proportion of  $p$ -value (from permutation analysis)  $\leq p^*$ . Then, the value of  $\hat{V}(p^*)$  was  
537 estimated by the mean proportion of  $p$ -value (from permutation analysis)  $\leq p^*$  for the  
538 300 permutation tests. For  $R(p^*)$ , we defined it as the number of  $p$ -value (from  
539 original analysis)  $\leq p^*$ . For  $q$ -value, we determined it from the lowest estimated FDR  
540 among all  $p$ -values (from original analysis)  $\geq p^*$ .

541  
542  
543

544 **Acknowledgements**

545 We thank Sébastien Moretti for help with Selectome data retrieval, the Bgee team for  
546 help with expression data retrieval, Barbara Piasecka for help with programming,  
547 Josephine T. Daub for help with polygenic selection analysis, and Julien Roux, Elsa  
548 Guillot, Iakov Davydov and all members of the Robinson-Rechavi lab for helpful  
549 discussions. Part of the computations were performed at the Vital-IT  
550 (<http://www.vital-it.ch>) Center for high-performance computing of the SIB Swiss  
551 Institute of Bioinformatics. JL is supported by Swiss National Science Foundation  
552 grant 31003A\_153341 / 1.

553 **AUTHOR CONTRIBUTIONS**

554 JL and MRR designed the work. JL performed the data gathering and analysis. JL and  
555 MRR interpreted the results. JL wrote the first draft of the paper. JL and MRR  
556 finalized the paper.

557

558

559 **Tables**

560 **Table 1**

561 P-values of randomization test for modular analysis.

|                        |                       |          |               |            |             |       |          |       |
|------------------------|-----------------------|----------|---------------|------------|-------------|-------|----------|-------|
| <i>D. melanogaster</i> | Early embryo          |          | Middle embryo |            | Late embryo | Larva | Pupae    | Adult |
| <i>p-value</i>         | 0.014                 |          | 0.484         |            | 0.263       | 0.435 | 0.213    | 0.018 |
| <i>D. rerio</i>        | Cleavage/<br>Blastula | Gastrula | Segmentation  | Pharyngula |             | Larva | Juvenile | Adult |
| <i>p-value</i>         | 0.166                 | 0.238    | 0.448         | 0.005      |             | 0.273 | 0.003    | 0.066 |
| <i>M. musculus</i>     | Early embryo          |          | Middle embryo |            | Late embryo |       |          |       |
| <i>p-value</i>         | 0.094                 |          | 0.043         |            | 0.001       |       |          |       |

562

563

564 **Table 2**  
 565 Candidate pathways enriched with signal of positive selection. We reported all  
 566 pathways with  $q$ -value  $<0.2$  after removing overlapping genes (“pruning”) for *D.*  
 567 *rerio*, *D. melanogaster* and *M. musculus*.

| Species                | Rank | Pathway                                                              | Pathway size before /after pruning | $p$ value before pruning | $q$ value before pruning | $p$ value after pruning | $q$ value after pruning |
|------------------------|------|----------------------------------------------------------------------|------------------------------------|--------------------------|--------------------------|-------------------------|-------------------------|
| <i>D. rerio</i>        | 1    | Laminin interactions                                                 | 12/12                              | 2.00E-06                 | 1.32E-03                 | 2.00E-06                | 0.00E+00                |
|                        | 2    | Phenylalanine metabolism                                             | 10/10                              | 7.70E-05                 | 1.51E-02                 | 7.80E-05                | 8.78E-03                |
|                        | 3    | Visual phototransduction                                             | 33/33                              | 9.10E-05                 | 1.51E-02                 | 8.30E-05                | 8.78E-03                |
|                        | 4    | Metabolism of carbohydrates                                          | 119/118                            | 2.02E-04                 | 2.23E-02                 | 2.37E-04                | 2.97E-02                |
|                        | 5    | Gamma carboxylation, hypusine formation and arylsulfatase activation | 18/18                              | 1.46E-03                 | 8.05E-02                 | 1.24E-03                | 1.16E-01                |
|                        | 6    | Extracellular matrix organization                                    | 75/61                              | 2.00E-05                 | 6.62E-03                 | 1.50E-03                | 1.16E-01                |
|                        | 7    | Acyl chain remodelling of PE                                         | 10/10                              | 5.12E-03                 | 1.79E-01                 | 3.79E-03                | 1.66E-01                |
|                        | 8    | Base excision repair                                                 | 24/24                              | 4.94E-03                 | 1.79E-01                 | 3.82E-03                | 1.66E-01                |
|                        | 9    | Aminoacyl-tRNA biosynthesis                                          | 30/30                              | 6.23E-03                 | 1.97E-01                 | 3.93E-03                | 1.66E-01                |
|                        | 10   | Phase II conjugation                                                 | 37/30                              | 1.08E-03                 | 6.92E-02                 | 4.00E-03                | 1.66E-01                |
| <i>D. melanogaster</i> | 1    | Triglyceride Biosynthesis                                            | 59/59                              | 7.60E-05                 | 1.57E-02                 | 7.60E-05                | 3.32E-02                |
|                        | 2    | Glycosaminoglycan degradation                                        | 16/16                              | 6.99E-04                 | 4.70E-02                 | 6.37E-04                | 9.44E-02                |
|                        | 3    | Metabolism of porphyrins                                             | 12/12                              | 1.57E-03                 | 7.31E-02                 | 1.47E-03                | 9.62E-02                |
|                        | 4    | Detoxification of Reactive Oxygen Species                            | 17/17                              | 1.45E-03                 | 7.31E-02                 | 1.48E-03                | 9.62E-02                |
|                        | 5    | Longevity regulating pathway                                         | 43/28                              | 2.83E-02                 | 3.12E-01                 | 3.37E-03                | 1.54E-01                |
|                        | 6    | ECM-receptor interaction                                             | 10/10                              | 4.54E-03                 | 1.66E-01                 | 4.10E-03                | 1.54E-01                |
|                        | 7    | Lysine degradation                                                   | 25/15                              | 1.84E-02                 | 2.86E-01                 | 5.15E-03                | 1.54E-01                |
|                        | 8    | Metabolic pathways                                                   | 813/767                            | 3.04E-04                 | 3.11E-02                 | 5.23E-03                | 1.54E-01                |
|                        | 9    | Glutathione metabolism                                               | 55/32                              | 2.59E-02                 | 3.12E-01                 | 5.66E-03                | 1.54E-01                |
| <i>M. musculus</i>     | 1    | Pantothenate and CoA biosynthesis                                    | 16/16                              | 9.10E-05                 | 7.20E-02                 | 9.10E-05                | 5.01E-02                |
|                        | 2    | Mineralocorticoid biosynthesis                                       | 10/10                              | 1.52E-04                 | 7.20E-02                 | 1.40E-04                | 5.01E-02                |
|                        | 3    | Mitochondrial translation                                            | 72/72                              | 2.91E-04                 | 7.86E-02                 | 2.73E-04                | 5.25E-02                |
|                        | 4    | Cytokine-cytokine receptor interaction                               | 100/100                            | 3.41E-04                 | 7.86E-02                 | 2.78E-04                | 5.25E-02                |

568  
 569  
 570  
 571  
 572  
 573  
 574  
 575  
 576  
 577  
 578

579 **Table S1**

580 Multiple test corrected p-values (Benjamini–Hochberg method) of randomization test  
 581 for modular analysis.

582

|                        |                       |          |               |            |             |       |          |       |
|------------------------|-----------------------|----------|---------------|------------|-------------|-------|----------|-------|
| <i>D. melanogaster</i> | Early embryo          |          | Middle embryo |            | Late embryo | Larva | Pupae    | Adult |
| <i>p-value</i>         | 0.056                 |          | 0.484         |            | 0.336       | 0.478 | 0.336    | 0.058 |
| <i>D. rerio</i>        | Cleavage/<br>Blastula | Gastrula | Segmentation  | Pharyngula |             | Larva | Juvenile | Adult |
| <i>p-value</i>         | 0.295                 | 0.336    | 0.478         | 0.027      |             | 0.336 | 0.024    | 0.151 |
| <i>M. musculus</i>     | Early embryo          |          | Middle embryo |            | Late embryo |       |          |       |
| <i>p-value</i>         | 0.188                 |          | 0.115         |            | 0.016       |       |          |       |

583

584

585

586 **Figures legends**

587 **Figure 1: Variation of  $\Delta\ln L$  in different modules.**

588 For each module, dots are values of  $\Delta\ln L$  for individual genes and the black line is the  
589 mean of  $\Delta\ln L$ . Red (respectively blue) dots indicate modules for which the mean of  
590  $\Delta\ln L$  is significantly ( $p < 0.05$ ) higher (respectively lower) than the mean of  $\Delta\ln L$  from  
591 all modules. The green dashed line denotes the mean value of  $\Delta\ln L$  from all modular  
592 genes.

593

594 **Figure 2: Transcriptome index of  $\Delta\ln L$  (TLI) across development.**

595 For sub-figure A, B and C:

596 Orange, blue, red, green and purple time points represent stages within the  
597 developmental periods of maternal stage, early development, middle development,  
598 late development, and adult, respectively. For the adult stage, the black solid circle  
599 represents TLI from average expression between male and female; the purple solid  
600 triangle and square represent TLI from only males or females, respectively.

601 For sub-figure D, E and F:

602 Comparison of the TLI (mean TLI of all stages within a period) between any two  
603 different periods. Each period has 10,000 pseudo-TLIs which come from random  
604 resampling with replacement.

605

606 **Figure 3: Expression in development for genes involved in pathways enriched  
607 with signal of positive selection.**

608 Each solid circle represents the ratio of the median expression for genes involved in  
609 pathways enriched with signal of positive selection to the median expression for genes  
610 involved in pathways without signal of positive selection. Orange, blue, red, green  
611 and purple time points represent stages within the developmental periods maternal  
612 stage, early development, middle development, late development, and adult,  
613 respectively. In adult samples, black solid circles represent ratios generated from  
614 average expression of males and females; purple solid triangles and squares represent  
615 ratios generated from only males or only females, respectively.

616

617



618 **Figure S1: Expression profiles of different modules across development.**

619 The bold black line represents median expression of modular genes, the two gray lines  
620 represent 25th and 75th quantiles of expression of modular genes respectively. The  
621 blue, red and green named stages represent early, middle and late modules  
622 respectively.

623 **Figure S2: Proportion of genes with strong evidence of positive selection in each**  
624 **module.**

625 The number of genes in each module is indicated below each box. The  $p$ -value from  
626 chi-square goodness of fit test is reported in the top-left corner of each graph.

627 **Figure S3: Proportion of genes with weak evidence of positive selection in each**  
628 **module.**

629 Legend as in Figure S2.

630 **Figure S4: Spearman's correlation between gene properties and  $\Delta \ln L$ .**

631 Spearman's correlation coefficient ( $\rho$ ) and adjusted  $p$ -value are indicated in the top-  
632 right corner of each graph. Loess regression lines are plotted in red.

633 **Figure S5: Variation of gene length in different modules.**

634 Legend as in Figure 1.

635 **Figure S6: Transcriptome index of gene length across development.**

636 Legend as in Figure 2.

637 **Figure S7: Transcriptome index of  $\Delta \ln L$  (TLI) for non-immune genes.**

638 Legend as in Figure 2.

639 **Figure S8: Transcriptome index of  $\Delta \ln L$  (TLI) for non-testis genes in *M.***  
640 ***musculus* and *D. melanogaster*.**

641 Legend as in Figure 2.

642 **Figure S9: Scatter plot of genes based on principal component analysis**

643 Each dot represents one gene, grey dots represent genes not assigned to any  
644 modules, blue dots represent genes in early embryo module, red dots represent  
645 genes in middle embryo module, blue dots represent genes in late embryo module,  
646 pink dots represent genes in larva module, and purple dots represent genes in  
647 pupae/adult module. Arrow indicates the gene expression order (from early to late).

648 **Figure S10: Heat map of gene expression across development**

649 Genes arranged by the order of expression (from early to late). Generally, the  
650 earlier genes have higher expression in earlier stages. Color bar represents the  
651 standardized expression value.

652 **Figure S11: idealized expression profile for each module.**

653 **Figure S12: Correction of gene length for polygenic selection.**

654 The red lines indicate the boundaries of bins which contains genes with similar length.

## 655 **References**

- 656 Ackermann M, Strimmer K. 2009. A general modular framework for gene set  
657 enrichment analysis. *BMC Bioinformatics* 10:47.
- 658 Amundson R. 2007. *The changing role of the embryo in evolutionary thought : roots*  
659 *of evo-devo*. Cambridge University Press.
- 660 Artieri CG, Haerty W, Singh RS. 2009. Ontogeny and phylogeny: molecular  
661 signatures of selection, constraint, and temporal pleiotropy in the development of  
662 *Drosophila*. *BMC Biol.* 7:42.
- 663 Ballard WW. 1981. Morphogenetic Movements and Fate Maps of Vertebrates. *Am.*  
664 *Zool.* 21:391–399.
- 665 Berg JJ, Coop G. 2014. A Population Genetic Signal of Polygenic Adaptation. *PLoS*  
666 *Genet.* 10:e1004412.
- 667 Bergmann S, Ihmels J, Barkai N. 2003. Iterative signature algorithm for the analysis  
668 of large-scale gene expression data. *Phys Rev E Stat Nonlin Soft Matter Phys*  
669 67:31902.
- 670 Brakefield PM. 2006. Evo-devo and constraints on selection. *Trends Ecol. Evol.*  
671 21:362–368.
- 672 Burga A, Wang W, Ben-David E, Wolf PC, Ramey AM, Verdugo C, Lyons K, Parker  
673 PG, Kruglyak L. 2017. A genetic signature of the evolution of loss of flight in  
674 the Galapagos cormorant. *Science* 356:eaal3345.
- 675 Cai JJ, Petrov DA. 2010. Relaxed purifying selection and possibly high rate of  
676 adaptation in primate lineage-specific genes. *Genome Biol. Evol.* 2:393–409.
- 677 Canal L. 2005. A normal approximation for the chi-square distribution. *Comput. Stat.*  
678 *Data Anal.* 48:803–808.
- 679 Carbon S, Ireland A, Mungall CJ, Shu S, Marshall B, Lewis S, AmiGO Hub the A,  
680 Web Presence Working Group the WPW. 2009. AmiGO: online access to  
681 ontology and annotation data. *Bioinformatics* 25:288–289.
- 682 Carroll SB. 2008. Evo-Devo and an Expanding Evolutionary Synthesis: A Genetic  
683 Theory of Morphological Evolution. *Cell* 134:25–36.
- 684 Caspi R, Altman T, Billington R, Dreher K, Foerster H, Fulcher CA, Holland TA,  
685 Keseler IM, Kothari A, Kubo A, et al. 2014. The MetaCyc database of metabolic  
686 pathways and enzymes and the BioCyc collection of Pathway/Genome  
687 Databases. *Nucleic Acids Res.* 42:459–471.

- 688 Castillo-Davis CI, Hartl DL. 2002. Genome evolution and developmental constraint  
689 in *Caenorhabditis elegans*. *Mol. Biol. Evol.* 19:728–735.
- 690 Croft D, Mundo AF, Haw R, Milacic M, Weiser J, Wu G, Caudy M, Garapati P,  
691 Gillespie M, Kamdar MR, et al. 2014. The Reactome pathway knowledgebase.  
692 *Nucleic Acids Res.* 42:1–6.
- 693 Darwin C. 1871. *The descent of man, and selection in relation to sex*. Princeton  
694 University Press
- 695 Daub JT, Hofer T, Cutivet E, Dupanloup I, Quintana-Murci L, Robinson-Rechavi M,  
696 Excoffier L. 2013. Evidence for polygenic adaptation to pathogens in the human  
697 genome. *Mol. Biol. Evol.* 30:1544–1558.
- 698 Daub JT, Moretti S, Davydov II, Excoffier L, Robinson-Rechavi M. 2017. Detection  
699 of pathways affected by positive selection in primate lineages ancestral to  
700 humans. *Mol. Biol. Evol.* 34:1391–1402.
- 701 Domazet-Loso T, Tautz D. 2010. A phylogenetically based transcriptome age index  
702 mirrors ontogenetic divergence patterns. *Nature* 468:815–818.
- 703 Drost H-G, Gabel A, Grosse I, Quint M. 2015. Evidence for active maintenance of  
704 phylotranscriptomic hourglass patterns in animal and plant embryogenesis. *Mol.*  
705 *Biol. Evol.* 32:1221–1231.
- 706 Duboule D. 1994. Temporal colinearity and the phylotypic progression: a basis for the  
707 stability of a vertebrate Bauplan and the evolution of morphologies through  
708 heterochrony. *Development* 1994:135–142.
- 709 Flajnik MF, Kasahara M. 2010. Origin and evolution of the adaptive immune system:  
710 genetic events and selective pressures. *Nat. Rev. Genet.* 11:47–59.
- 711 Fletcher W, Yang Z. 2010. The Effect of Insertions, Deletions, and Alignment Errors  
712 on the Branch-Site Test of Positive Selection. *Mol. Biol. Evol.* 27:2257–2267.
- 713 Garstang W. 1922. *The Theory of Recapitulation: A Critical Re-statement of the*  
714 *Biogenetic Law*. *J. Linn. Soc. London, Zool.* 35:81–101.
- 715 Geer LY, Marchler-Bauer A, Geer RC, Han L, He J, He S, Liu C, Shi W, Bryant SH.  
716 2009. The NCBI BioSystems database. *Nucleic Acids Res.* 38:492–496.
- 717 Gharib WH, Robinson-Rechavi M. 2013. The Branch-Site Test of Positive Selection  
718 Is Surprisingly Robust but Lacks Power under Synonymous Substitution  
719 Saturation and Variation in GC. *Mol. Biol. Evol.* 30:1675–1686.
- 720 Graveley BR, Brooks AN, Carlson JW, Duff MO, Landolin JM, Yang L, Artieri CG,

- 721 van Baren MJ, Boley N, Booth BW, et al. 2011. The developmental  
722 transcriptome of *Drosophila melanogaster*. *Nature* 471:473–479.
- 723 Hawkins DM, Wixley RAJ. 1986. A Note on the Transformation of Chi-Squared  
724 Variables to Normality. *Am. Stat.* 40:296.
- 725 Hoekstra HE, Coyne JA. 2007. The locus of evolution: evo devo and the genetics of  
726 adaptation. *Evolution* 61:995–1016.
- 727 Hu H, Uesaka M, Guo S, Shimai K, Lu T-M, Li F, Fujimoto S, Ishikawa M, Liu S,  
728 Sasagawa Y, et al. 2017. Constrained vertebrate evolution by pleiotropic genes.  
729 *Nat. Ecol. Evol.* 1:1722–1730.
- 730 Hurst LD. 2002. The Ka/Ks ratio: Diagnosing the form of sequence evolution. *Trends*  
731 *Genet.* 18:486–487.
- 732 Irie N, Kuratani S. 2011. Comparative transcriptome analysis reveals vertebrate  
733 phylotypic period during organogenesis. *Nat. Commun.* 2:248.
- 734 Irie N, Kuratani S. 2014. The developmental hourglass model: a predictor of the basic  
735 body plan? *Development* 141:4649–4655.
- 736 Kalinka AT, Tomancak P. 2012. The evolution of early animal embryos: conservation  
737 or divergence? *Trends Ecol. Evol.* 27:385–393.
- 738 Kalinka AT, Varga KM, Gerrard DT, Preibisch S, Corcoran DL, Jarrells J, Ohler U,  
739 Bergman CM, Tomancak P. 2010. Gene expression divergence recapitulates the  
740 developmental hourglass model. *Nature* 468:811–814.
- 741 Kanehisa M, Goto S, Sato Y, Kawashima M, Furumichi M, Tanabe M. 2014. Data,  
742 information, knowledge and principle: Back to metabolism in KEGG. *Nucleic*  
743 *Acids Res.* 42:199–205.
- 744 Kelder T, Van Iersel MP, Hanspers K, Kutmon M, Conklin BR, Evelo CT, Pico AR.  
745 2012. WikiPathways: Building research communities on biological pathways.  
746 *Nucleic Acids Res.* 40:1301–1307.
- 747 Kinsella RJ, Kahari A, Haider S, Zamora J, Proctor G, Spudich G, Almeida-King J,  
748 Staines D, Derwent P, Kerhornou A, et al. 2011. Ensembl BioMarts: a hub for  
749 data retrieval across taxonomic space. *Database* 2011:bar030.
- 750 Levin M, Anavy L, Cole AG, Winter E, Mostov N, Khair S, Senderovich N, Kovalev  
751 E, Silver DH, Feder M, et al. 2016. The mid-developmental transition and the  
752 evolution of animal body plans. *Nature* 531:637–641.
- 753 Levin M, Hashimshony T, Wagner F, Yanai I. 2012. Developmental milestones

- 754 punctuate gene expression in the *Caenorhabditis* embryo. *Dev. Cell* 22:1101–  
755 1108.
- 756 Li JJ, Huang H, Bickel PJ, Brenner SE. 2014. Comparison of *D. melanogaster* and *C.*  
757 *elegans* developmental stages, tissues, and cells by modENCODE RNA-seq data.  
758 *Genome Res.* 24:1086–1101.
- 759 Liu J, Robinson-Rechavi M. 2018. Developmental constraints on genome evolution in  
760 four bilaterian model species. [bioRxiv:doi.org/10.1101/161679](https://doi.org/10.1101/161679).
- 761 Moretti S, Laurency B, Gharib WH, Castella B, Kuzniar A, Schabauer H, Studer RA,  
762 Valle M, Salamin N, Stockinger H, et al. 2014. Selectome update: Quality  
763 control and computational improvements to a database of positive selection.  
764 *Nucleic Acids Res.* 42:917–921.
- 765 Müller GB. 2007. Evo–devo: extending the evolutionary synthesis. *Nat. Rev. Genet.*  
766 8:943–949.
- 767 Necsulea A, Kaessmann H. 2014. Evolutionary dynamics of coding and non-coding  
768 transcriptomes. *Nat. Rev. Genet.* 15:734–748.
- 769 Piasecka B, Lichocki P, Moretti S, Bergmann S, Robinson-Rechavi M. 2013. The  
770 Hourglass and the Early Conservation Models—Co-Existing Patterns of  
771 Developmental Constraints in Vertebrates. *PLoS Genet.* 9:e1003476.
- 772 Quint M, Drost H-G, Gabel A, Ullrich KK, Bönn M, Grosse I. 2012. A transcriptomic  
773 hourglass in plant embryogenesis. *Nature* 490:98–101.
- 774 Raff RA. 1996. *The shape of life : genes, development, and the evolution of animal*  
775 *form*. University of Chicago Press.
- 776 Raff RA. 2000. Evo-devo: the evolution of a new discipline. *Nat. Rev. Genet.* 1:74–  
777 79.
- 778 Richardson MK. 1999. *Vertebrate evolution: the developmental origins of adult*  
779 *variation*. *Bioessays* 21:604–613.
- 780 Riedl R. 1978. *Order in living organisms*. West Sussex, UK: Wiley-Interscience.
- 781 Roux J, Privman E, Moretti S, Daub JT, Robinson-Rechavi M, Keller L. 2014.  
782 Patterns of positive selection in seven ant genomes. *Mol. Biol. Evol.* 31:1661–  
783 1685.
- 784 Roux J, Robinson-Rechavi M. 2008. Developmental constraints on vertebrate genome  
785 evolution. *PLoS Genet.* 4:e1000311.
- 786 Sabbah S, Laria R, Gray SM, Hawryshyn CW. 2010. Functional diversity in the color

- 787 vision of cichlid fishes. *BMC Biol.* 8:133.
- 788 Salvador-Martínez I, Coronado-Zamora M, Castellano D, Barbadilla A, Salazar-  
789 Ciudad I. 2018. Mapping Selection within *Drosophila melanogaster* Embryo's  
790 Anatomy. *Mol. Biol. Evol.* 35:66–79.
- 791 Sander K. 1983. Development and evolution: the sixth Symposium of the British  
792 Society for Developmental Biology. Cambridge University Press.
- 793 Schaefer CF, Anthony K, Krupa S, Buchoff J, Day M, Hannay T, Buetow KH. 2009.  
794 PID: The pathway interaction database. *Nucleic Acids Res.* 37:674–679.
- 795 Slack JMW, Holland PWH, Graham CF. 1993. The zootype and the phylotypic stage.  
796 *Nature* 361:490–492.
- 797 Tadros W, Lipshitz HD. 2009. The maternal-to-zygotic transition: a play in two acts.  
798 *Development* 136:3033–3042.
- 799 Tickle C, Urrutia AO. 2017. Perspectives on the history of evo-devo and the  
800 contemporary research landscape in the genomics era. *Philos. Trans. R. Soc.*  
801 *Lond. B. Biol. Sci.* 372:20150473.
- 802 Tintle NL, Borchers B, Brown M, Bekmetjev A. 2009. Comparing gene set analysis  
803 methods on single-nucleotide polymorphism data from Genetic Analysis  
804 Workshop 16. *BMC Proc.* 3 (Suppl 7):S96.
- 805 Uchida Y, Uesaka M, Yamamoto T, Takeda H, Irie N. 2018. Embryonic lethality is  
806 not sufficient to explain hourglass-like conservation of vertebrate embryos.  
807 *Evodevo* 9:7.
- 808 Vitti JJ, Grossman SR, Sabeti PC. 2013. Detecting natural selection in genomic data.  
809 *Annu. Rev. Genet.* 47:97–120.
- 810 Von-Baer KE. 1828. Über Entwicklungsgeschichte der Tiere: Beobachtung und  
811 Reflexion. Königsberg: Gebrüder Bornträger.
- 812 Wolpert L. 1991. *The Triumph of the Embryo*. Oxford University Press.
- 813 Wray GA. 2007. The evolutionary significance of cis-regulatory mutations. *Nat. Rev.*  
814 *Genet.* 8:206–216.
- 815 Yang Z, Nielsen R. 1998. Synonymous and nonsynonymous rate variation in nuclear  
816 genes of mammals. *J. Mol. Evol.* 46:409–418.
- 817 Yang Z, Nielsen R. 2002. Codon-substitution models for detecting molecular  
818 adaptation at individual sites along specific lineages. *Mol. Biol. Evol.* 19:908–  
819 917.



820 Yates A, Akanni W, Amode MR, Barrell D, Billis K, Carvalho-Silva D, Cummins C,  
821 Clapham P, Fitzgerald S, Gil L, et al. 2016. Ensembl 2016. *Nucleic Acids Res.*  
822 44:D710–D716.

823 Zalts H, Yanai I. 2017. Developmental constraints shape the evolution of the  
824 nematode mid-developmental transition. *Nat. Ecol. Evol.* 1:0113.

825 Zhang J, Nielsen R, Yang Z. 2005. Evaluation of an improved branch-site likelihood  
826 method for detecting positive selection at the molecular level. *Mol. Biol. Evol.*  
827 22:2472–2479.

828

**Melanogaster group branch**

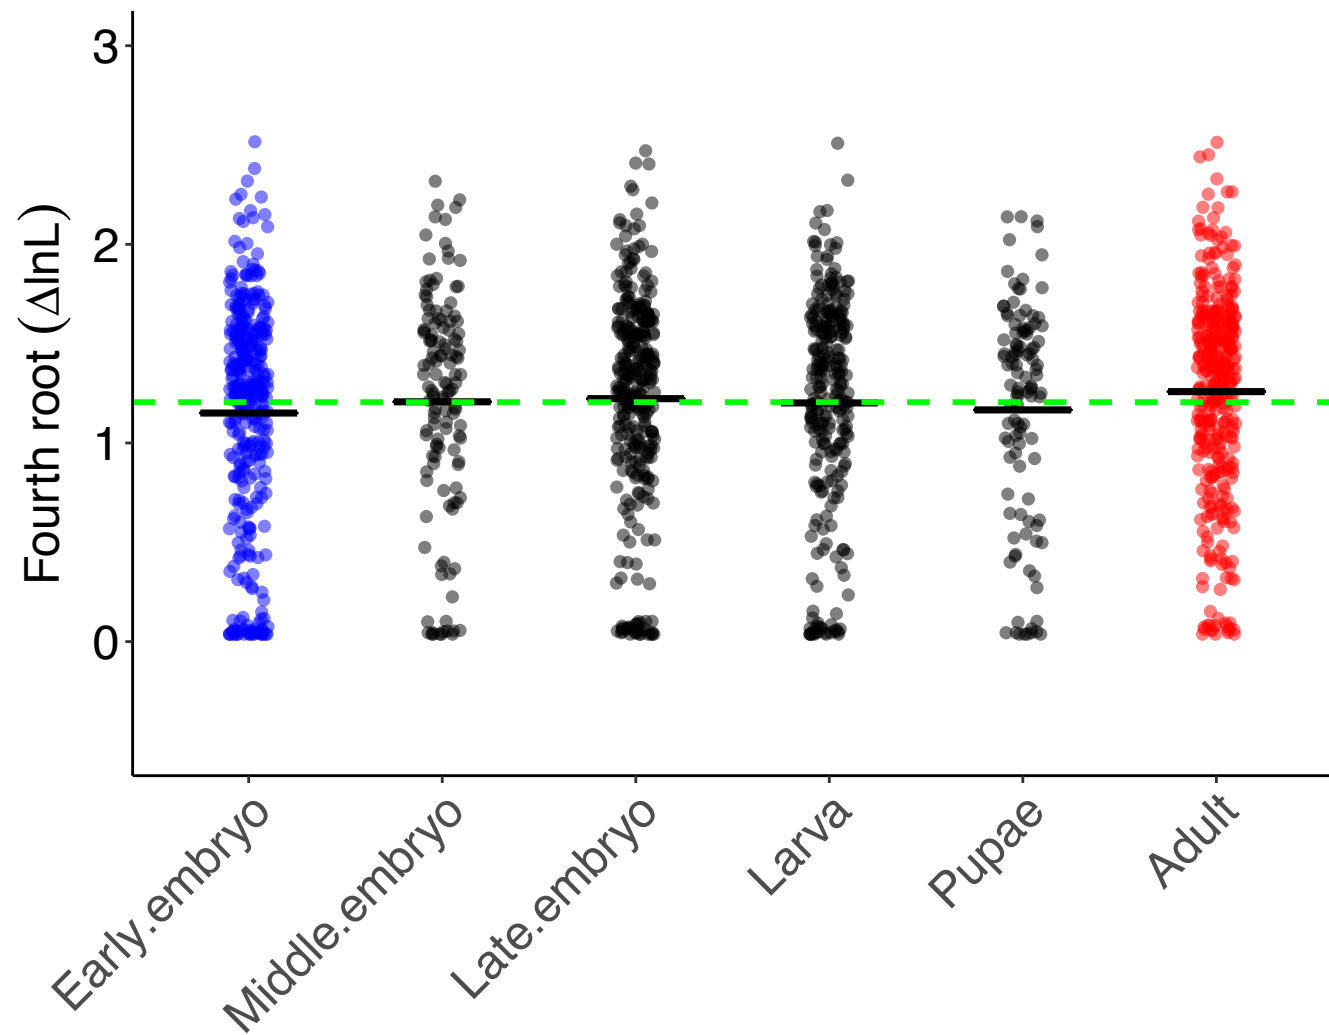

**Clupeocephala branch**

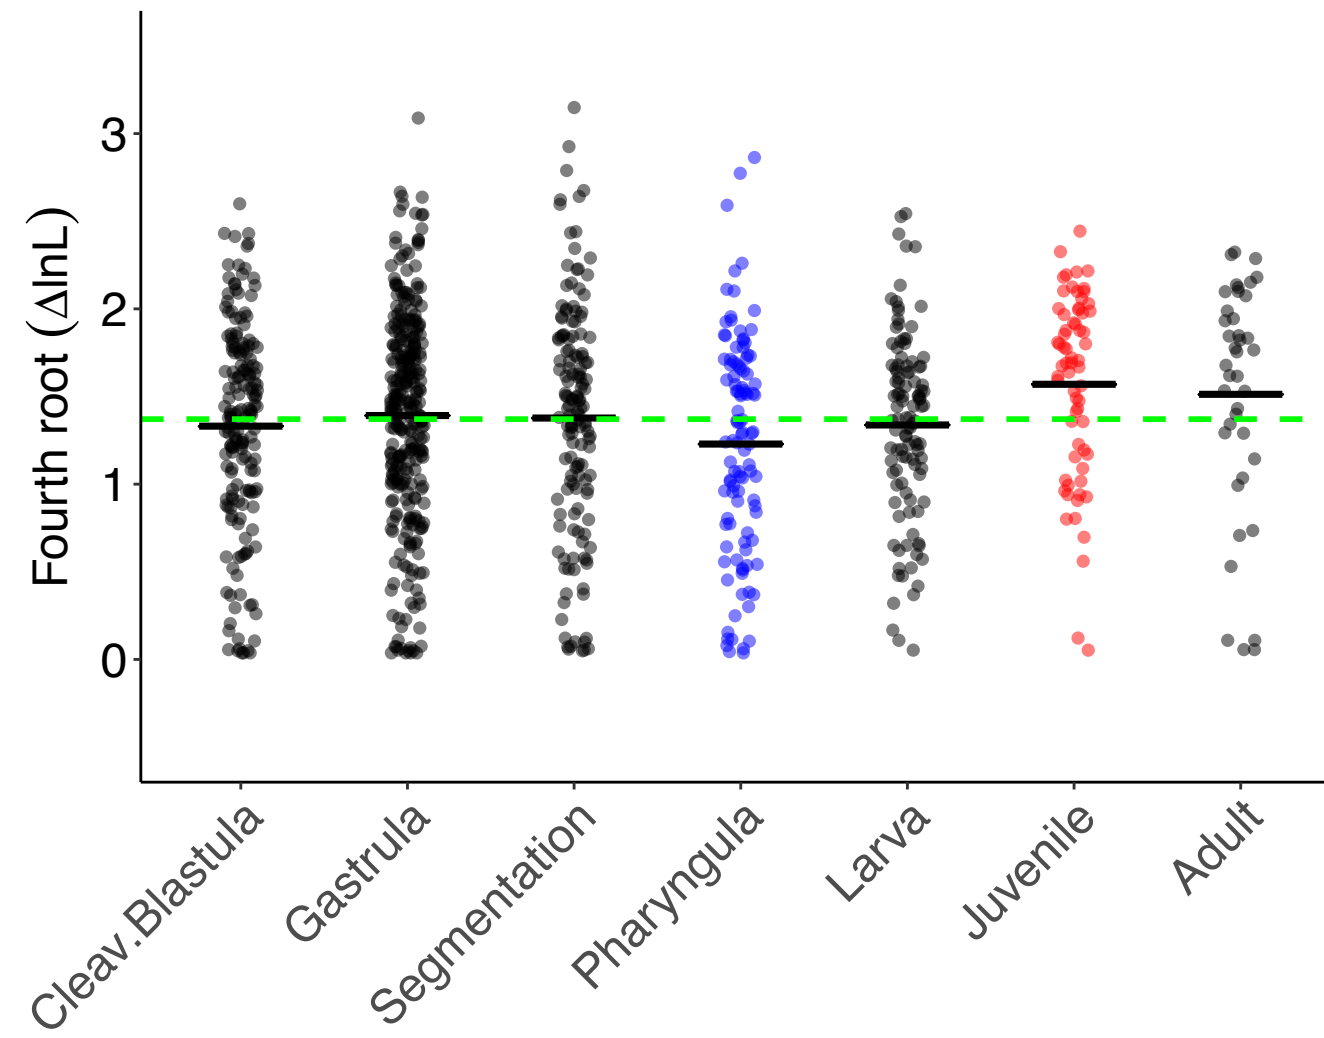

**Murinae branch**

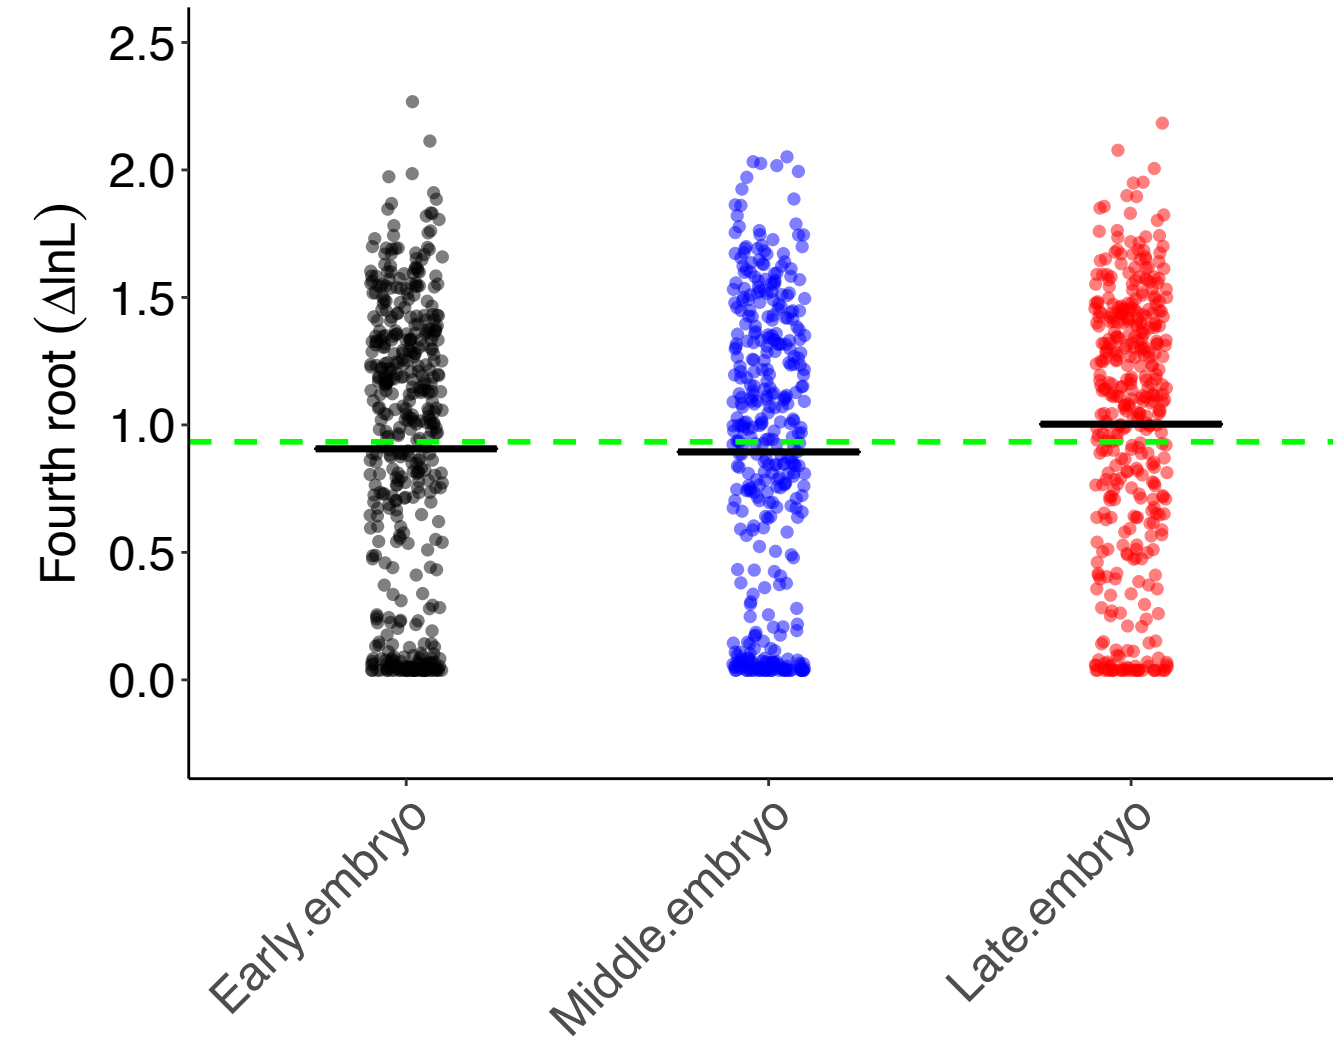

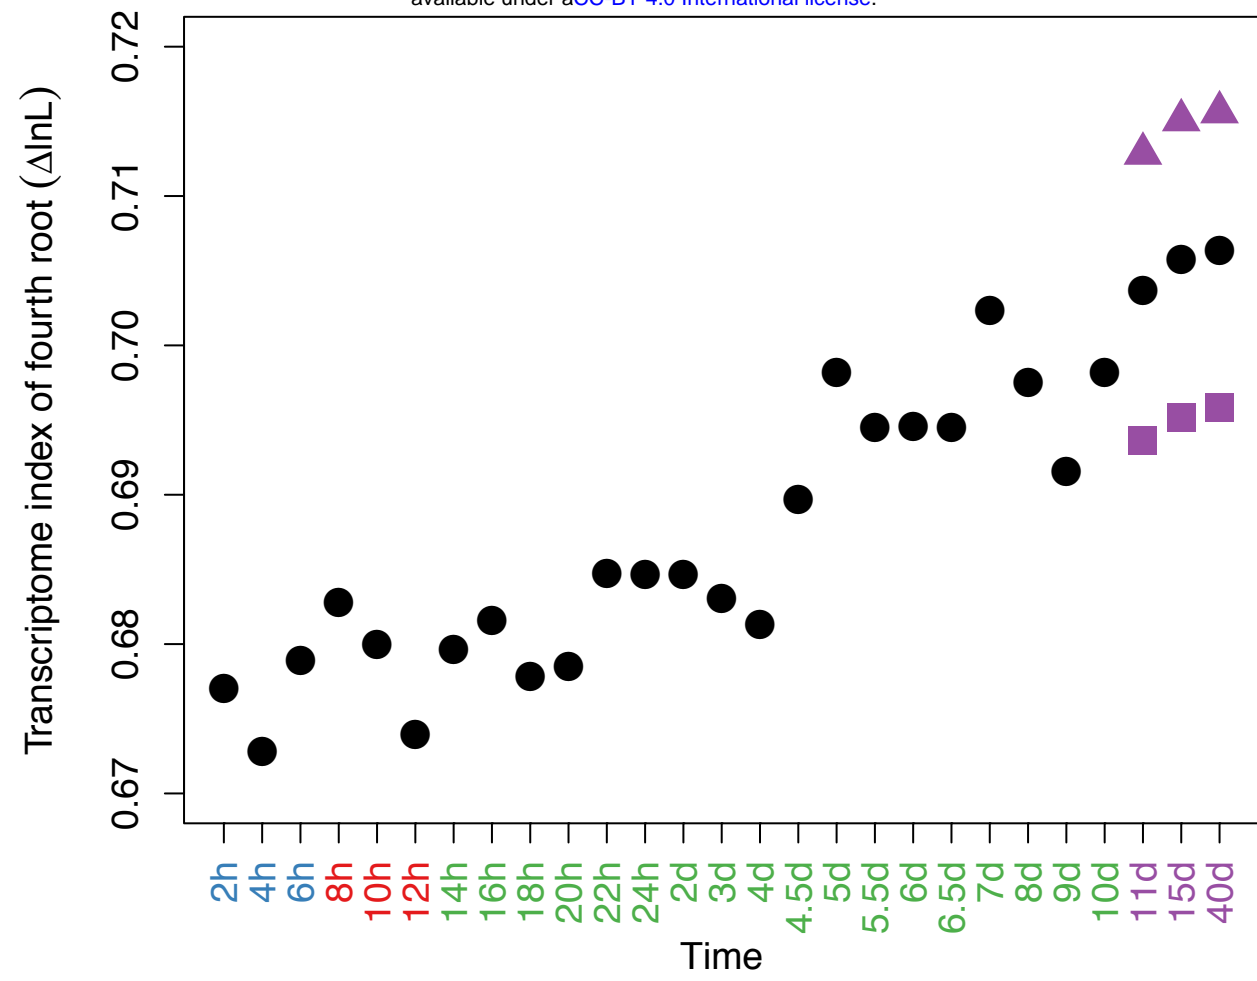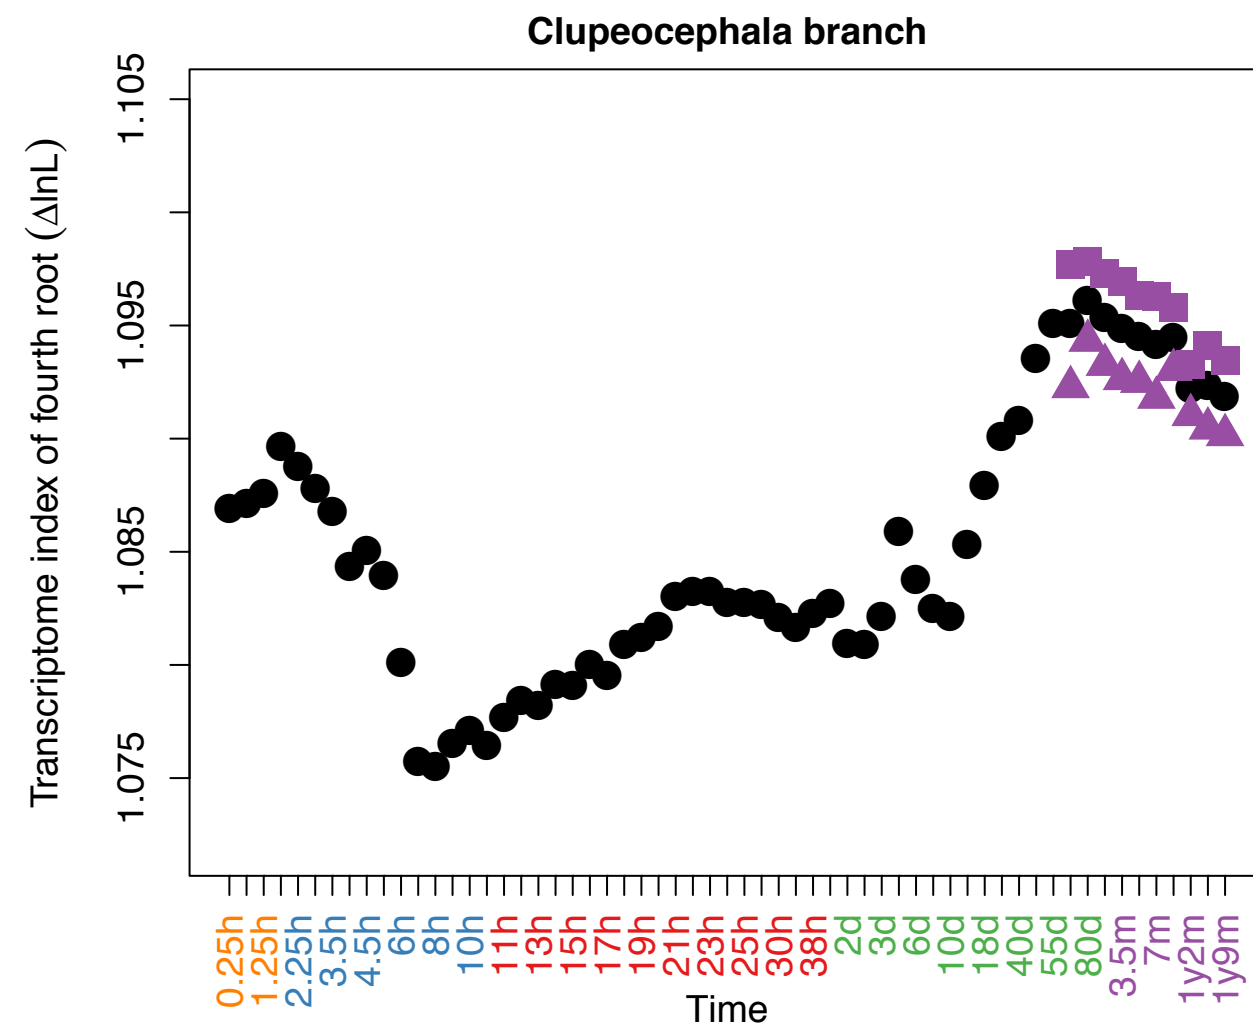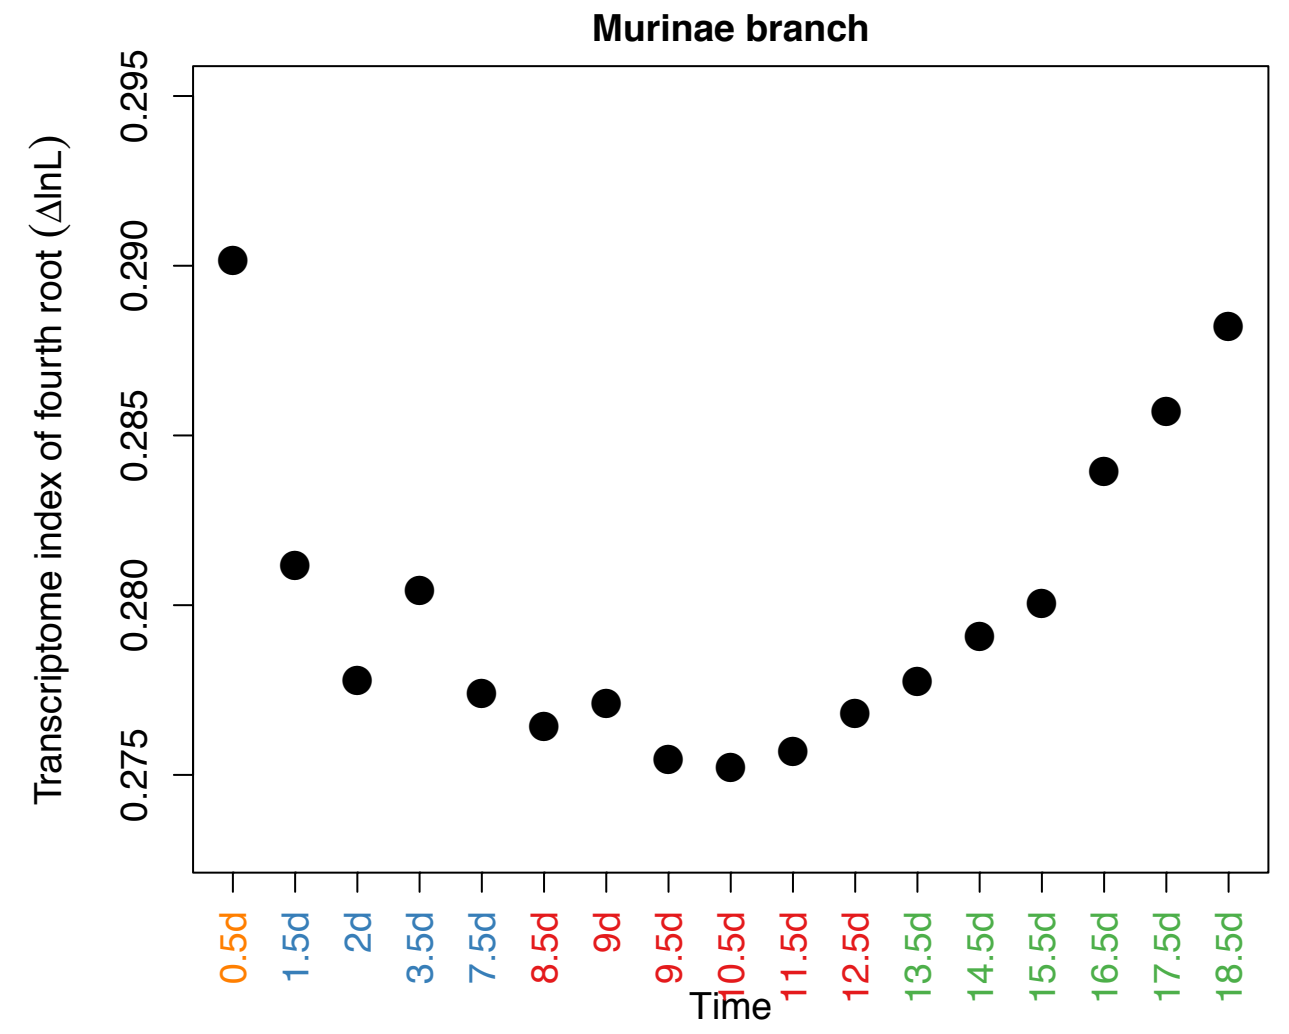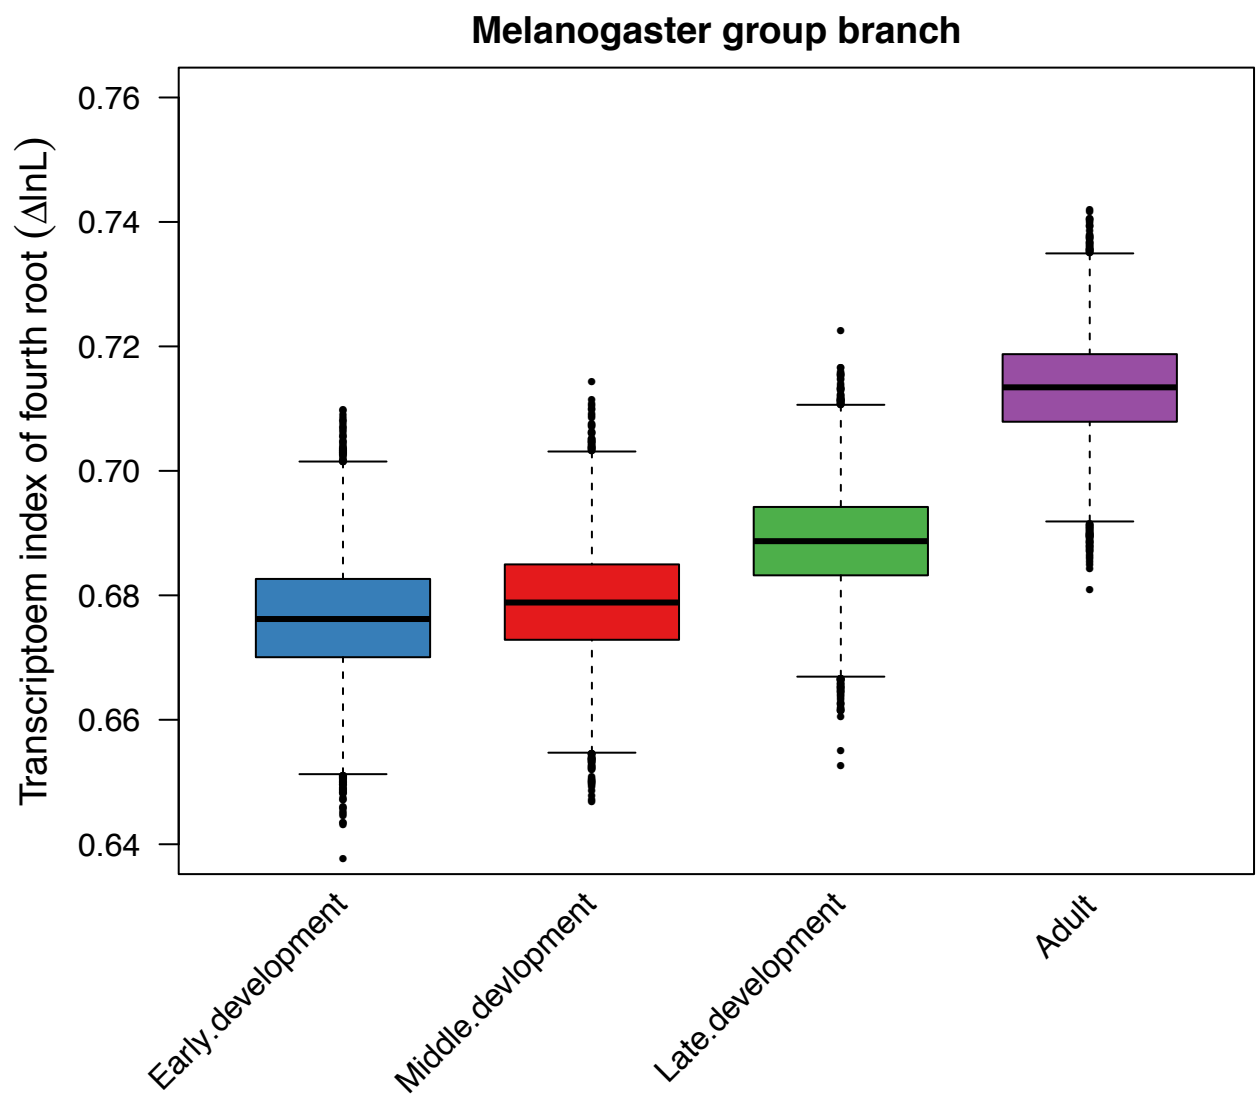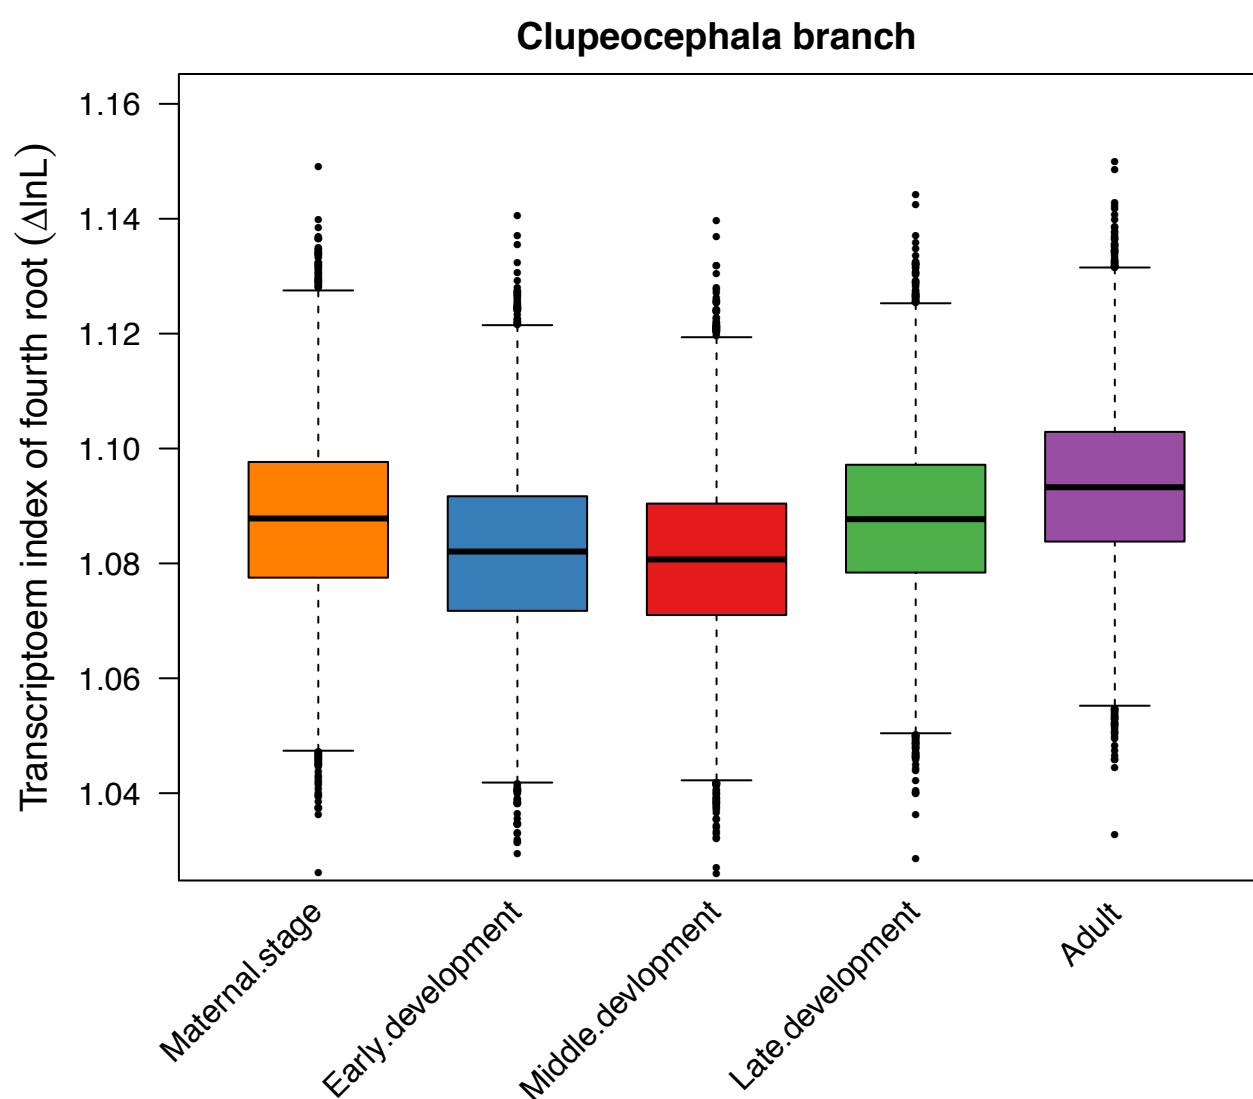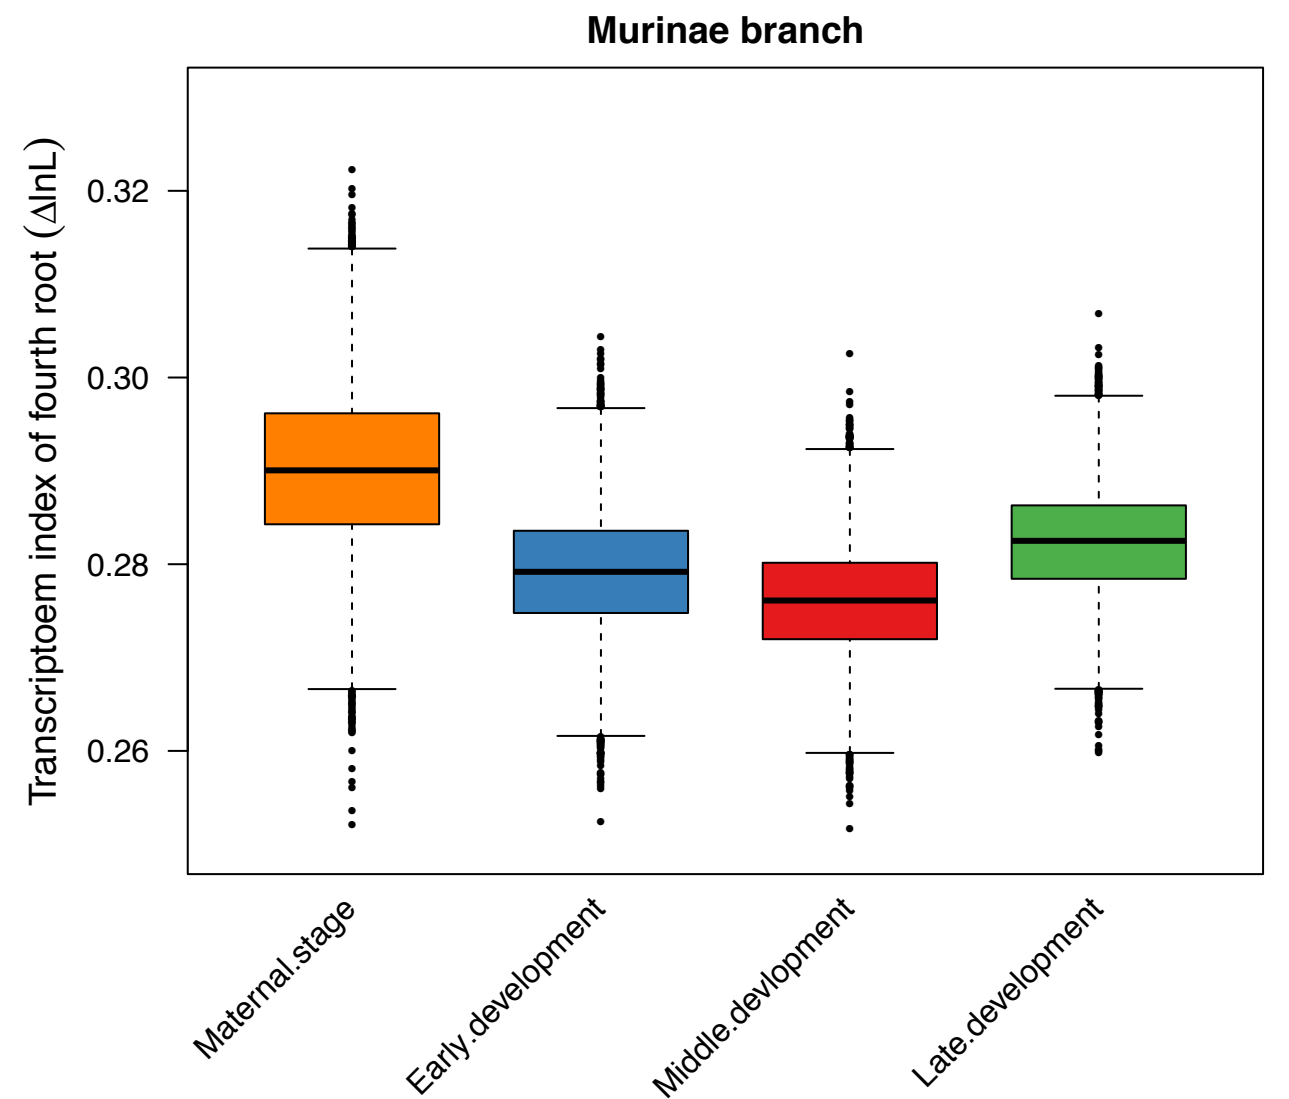

Melanogaster group branch

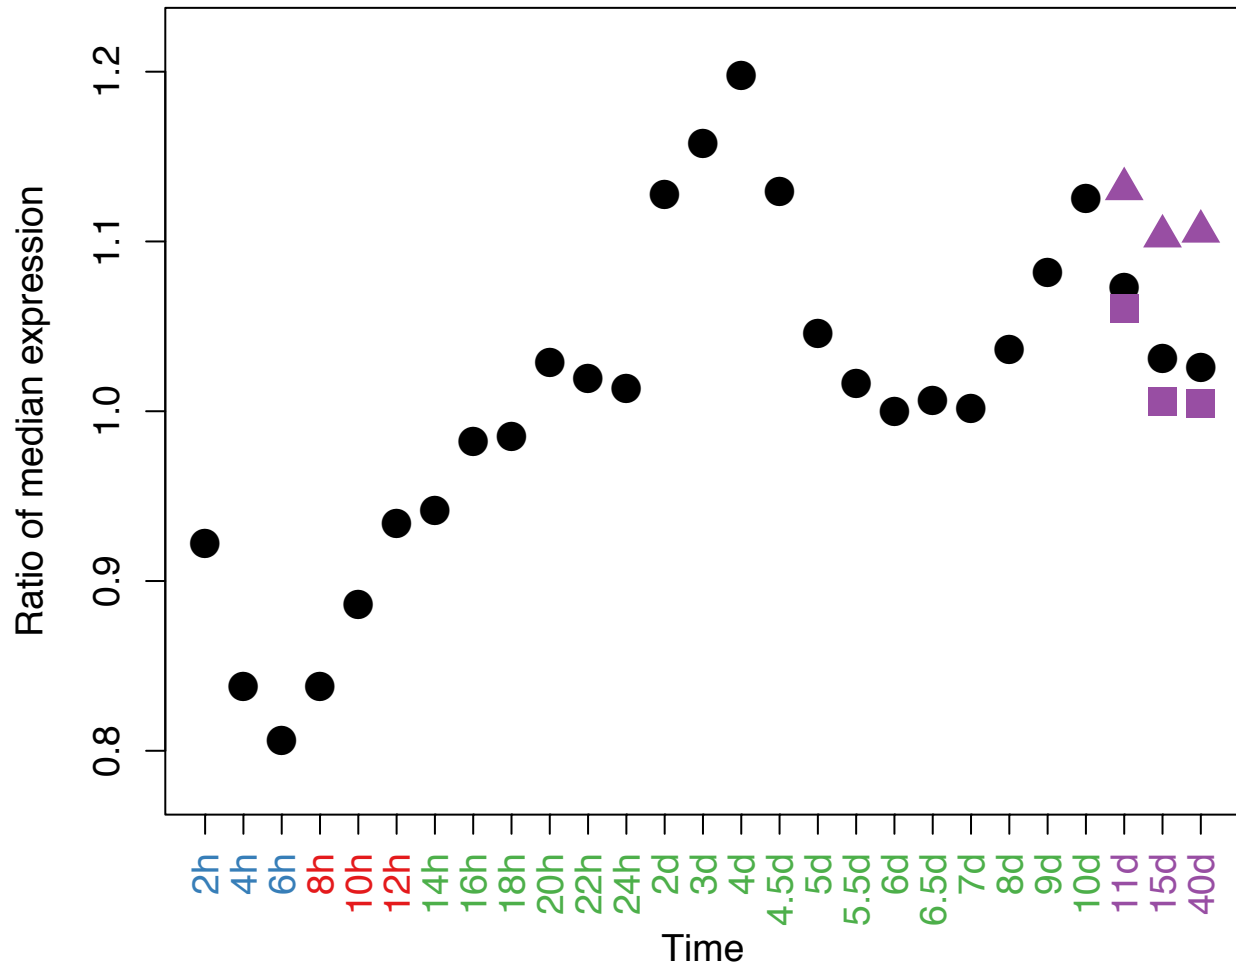

Clupeocephala branch

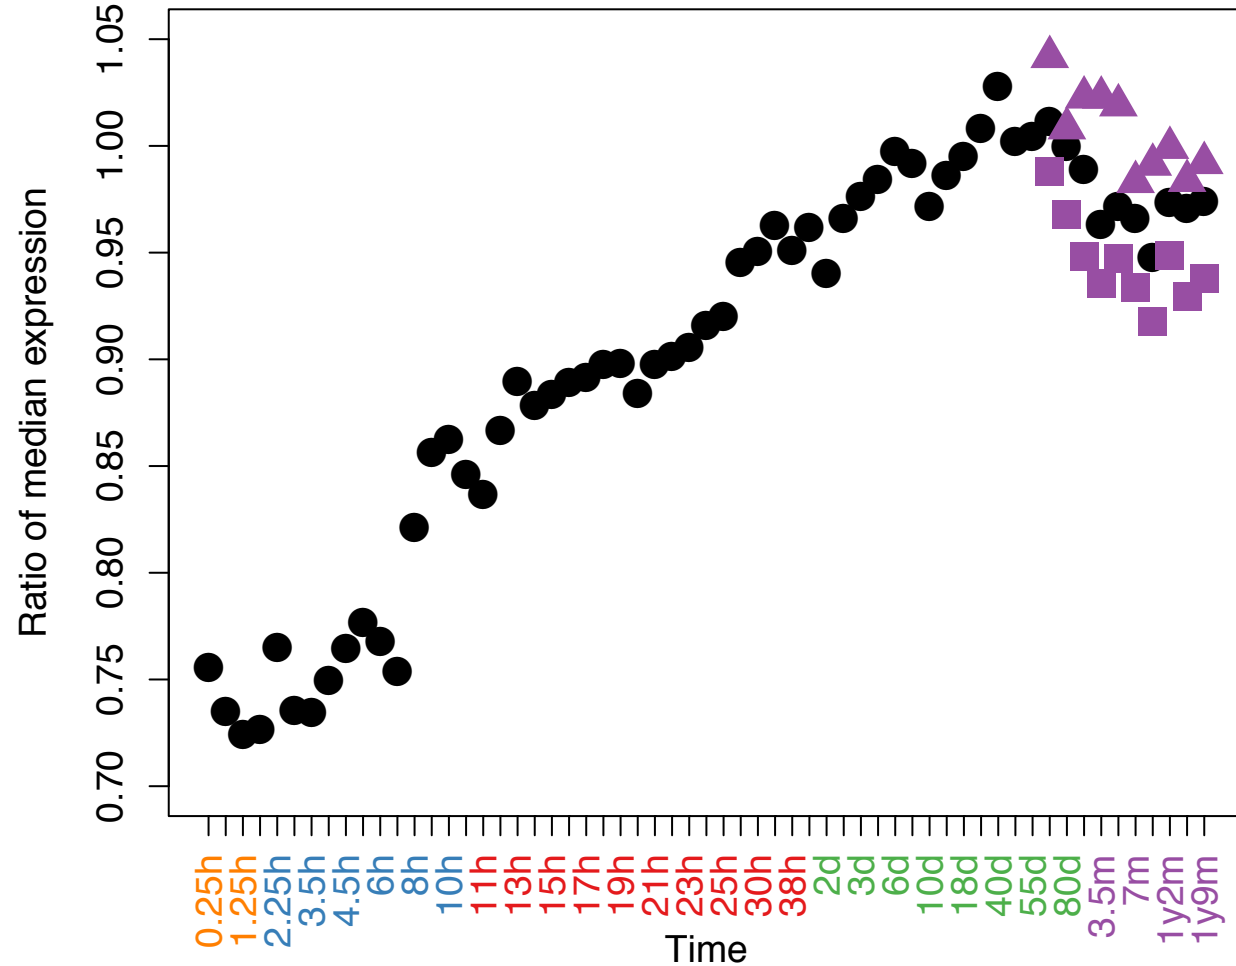

Murinae branch

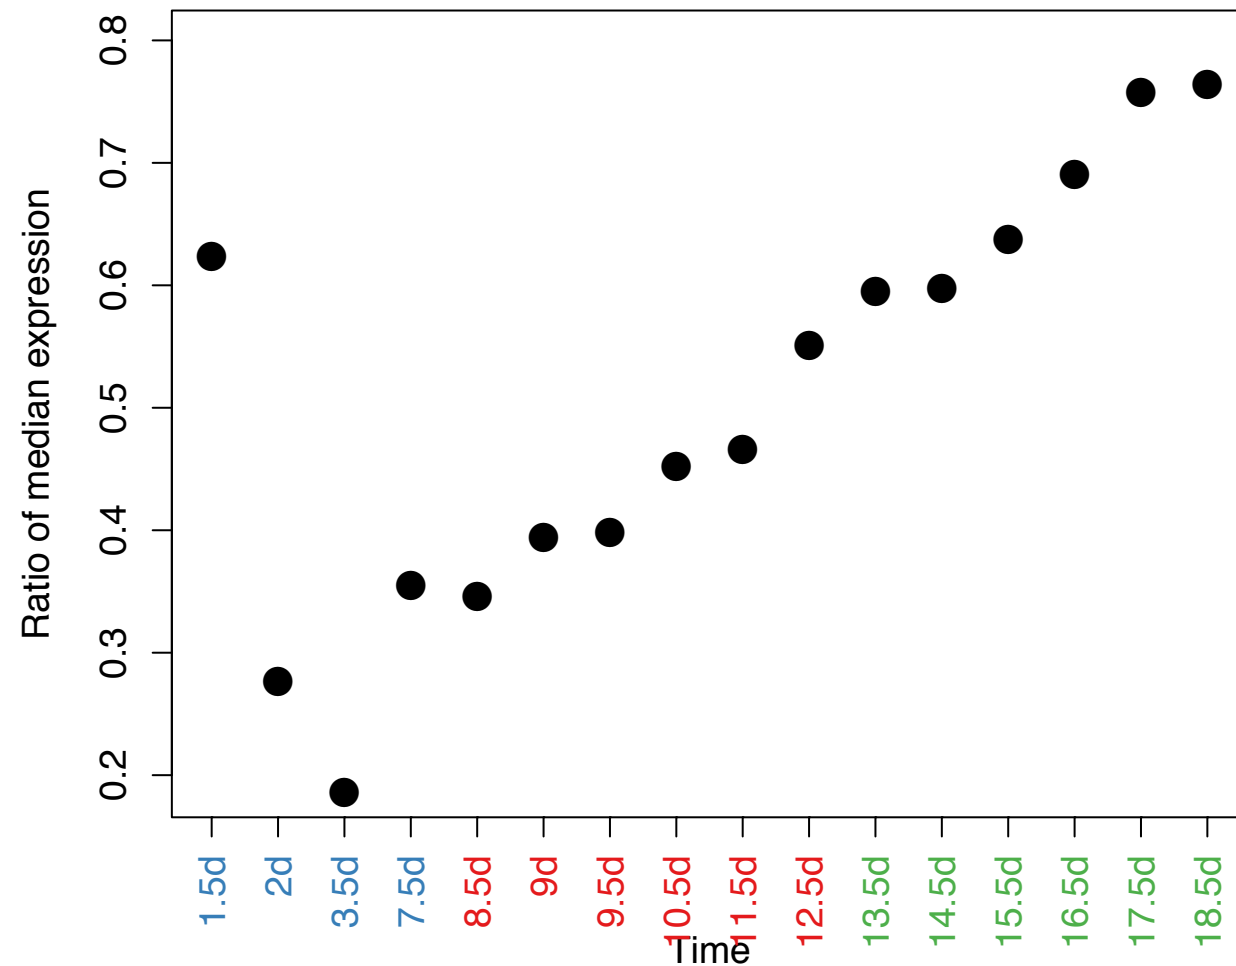

Source: https://www.biorxiv.org/content/10.1101/161711v4.full.pdf
